# Supplementary material for: Living polymerization of arylisocyanide initiated by the phenylethynyl palladium(ii) complex
Source: Royal Society of Chemistry journal article supplement (doi:10.1039/c4py01023j), 2014-01-01
Supplement: c4py01023j1.pdf [file c4py01023j1.pdf]

## Supporting Information

# Living polymerization of arylisocyanide initiated by phenylethynyl palladium(II) complex

Ya-Xin Xue, Jia-Li Chen, Zhi-Qiang Jiang, Zhipeng Yu, Na Liu, Jun Yin, Yuan-Yuan Zhu and Zong-

Quan Wu\*

*Department of Polymer Science and Engineering, School of Chemistry and Chemical Engineering, Hefei*

*University of Technology and Anhui Key Laboratory of Advanced Functional Materials and Devices,*

*Hefei 230009, China*

|                                                                                                                                                                                    |         |
|------------------------------------------------------------------------------------------------------------------------------------------------------------------------------------|---------|
| <b>Instruments</b> .....                                                                                                                                                           | S3      |
| <b>Materials</b> .....                                                                                                                                                             | S3      |
| <b>Synthetic procedures for Pd complexes 1a–d</b> .....                                                                                                                            | S4-S6   |
| <b>Typical polymerization procedure of 2a with 1a–d</b> .....                                                                                                                      | S6      |
| <b>Typical procedure used to grow poly(phenyl isocyanide)s of various <math>M_n</math></b> .....                                                                                   | S6      |
| <b>Typical kinetic study of the polymerization of 2a with 1a–d</b> .....                                                                                                           | S7      |
| <b>References</b> .....                                                                                                                                                            | S7      |
| <b>Table S1.</b> Polymerization results of <b>2b-g</b> with <b>1b</b> as initiator .....                                                                                           | S8      |
| <b>Fig. S1:</b> Single crystal structure of <b>1c</b> .....                                                                                                                        | S8      |
| <b>Fig. S2-6:</b> FT-IR, $^1\text{H}$ , $^{13}\text{C}$ , $^{31}\text{P}$ NMR and UV-vis spectra of poly- <b>a2a</b> <sub>100</sub> .....                                          | S9-     |
| S11                                                                                                                                                                                |         |
| <b>Fig. S7-10:</b> SEC chromatograms of the polymer of <b>2a</b> in different solvents .....                                                                                       | S11-S13 |
| <b>Fig. S11-16:</b> SEC chromatograms and plots of $M_n$ and $M_w/M_n$ with initial feed ratios of monomer to initiator for the polymerization of <b>2a</b> with <b>1a-d</b> ..... | S13-S16 |
| <b>Fig. S17-22:</b> Time-dependent SEC and plots of $M_n$ -conversion for the polymerization of <b>2a</b> with <b>1b-d</b> .....                                                   | S16-S19 |
| .....                                                                                                                                                                              |         |
| <b>Fig. S23-25:</b> SEC chromatograms of the polymers of <b>2b-f</b> with <b>1b</b> as initiator .....                                                                             | S19-S20 |
| <b>Fig. S26:</b> CD and UV-vis spectra of poly- <b>b2e</b> <sub>50</sub> .....                                                                                                     |         |
| S21                                                                                                                                                                                |         |
| <b>Fig. S27-42:</b> FT-IR, $^1\text{H}$ , $^{13}\text{C}$ and $^{31}\text{P}$ NMR spectra of compound <b>1a-d</b> .....                                                            | S21-S29 |
| <b>Fig. S43:</b> $^1\text{H}$ NMR spectra of monomer <b>2c</b> .....                                                                                                               | S29     |

**Fig. S44-55:** FT-IR,  $^1\text{H}$ ,  $^{31}\text{P}$  NMR and UV-vis spectra of the polymers of **2c-e** ..... S30-S35

### **Instruments.**

The  $^1\text{H}$ ,  $^{13}\text{C}$  and  $^{31}\text{P}$  NMR spectra were recorded using a Bruker 400 and 600 MHz  $\{^1\text{H}\}$  spectrometer. Size exclusion chromatography (SEC) was performed on Waters 1515 pump and 2414 differential refractive index (RI) detector (set at 40 °C) using a series of linear Styragel HR1, HR2 and HR4 columns. Molecular weight and polydispersity data are reported relative to polystyrene standards. The eluent was tetrahydrofuran (THF) at a flow rate of 0.3 mL/min. FT-IR spectra were recorded on Perkin-Elmer Spectrum BX FT-IR system using KBr pellets. UV-vis spectra were performed on a UNIC 4802 UV/VIS double beam spectrophotometer in 1.0 cm length quartz cell. Melting points were obtained with a Mel-Temp apparatus and are uncorrected. X-ray diffraction data of single crystals were collected on a Siemens Smart 1000 CCD diffractometer. The determination of unit cell parameters and data collections were performed with Mo-K $\alpha$  radiation ( $\lambda = 0.71073 \text{ \AA}$ ). Unit cell dimensions were obtained with least-squares refinements and all structures were solved by direct methods using SHELXS-97. The other nonhydrogen atoms were located in successive difference Fourier syntheses. The final refinement was performed using full-matrix least-squares methods with anisotropic thermal parameters for non-hydrogen atoms on F2. The hydrogen atoms were added theoretically and riding on the concerned atoms.

### **Materials**

All solvents were purified by the standard procedures before use. THF was further dried over sodium

benzophenone ketyl, distilled onto LiAlH<sub>4</sub> under nitrogen, and distilled under high vacuum just before use. 4-Ethynyltoluene, 4-ethynylanisole, 1-ethynylbenzene, 4-(methoxycarbonyl)phenylacetylene, ethynyltrimethylsilane, *trans*-dichlorobis(triethylphosphine)palladium(II) and copper(I) chloride were purchased from Aladdin and Sigma-Aldrich, and were used as received without further purification. Isocyanide monomer **2a**, **2b**, **2c**, **2d**, **2e**, and **2f** were prepared according to the literatures and the structures were confirmed by <sup>1</sup>H NMR.<sup>1</sup>

### Synthetic procedure for **1a-d**

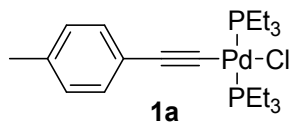

**Synthesis of 1a.** This Pd complex was prepared according to the reported procedure.<sup>2</sup> 4-Ethynyltoluene (50.0 mg, 0.43 mmol) was treated with *trans*-dichlorobis(triethylphosphine)palladium (178.0 mg, 0.43 mmol) in the presence of copper(I) chloride (2.5 mg, 0.025 mmol) as catalyst in 30 mL of diethylamine and dichloromethane (v/v = 1/1). The mixture was stirred at room temperature for 1 h. After the solvent was removed by evaporation under reduced pressure, the residue was purified by chromatography with petrol ether-ethyl acetate (10/1, v/v) as eluent. The crude product was recrystallized from petrol ether and methanol to afford **1a** as a white solid (127 mg, 60% yield). <sup>1</sup>H NMR (400 MHz, CDCl<sub>3</sub>, 25 °C): δ 7.16 (d, *J* = 8.8 Hz, 2H, aromatic), 7.03 (d, *J* = 8.8 Hz, 2H, aromatic), 2.31 (s, 3H, CH<sub>3</sub>-Ph), 2.00–1.95 (m, 12H, PCH<sub>2</sub>CH<sub>3</sub>), 1.24–1.16 (m, 18H, PCH<sub>2</sub>CH<sub>3</sub>). <sup>13</sup>C NMR (100 MHz, CDCl<sub>3</sub>, 25 °C): δ 135.45, 130.58, 128.86, 124.89, 106.42, 93.59, 21.35, 15.46, 8.40. <sup>31</sup>P NMR (121.5 MHz, CDCl<sub>3</sub>, 25 °C): δ 17.85. FT-IR (KBr, cm<sup>-1</sup>): 2959 (ν<sub>C-H</sub>, aromatic), 2932 (ν<sub>C-H</sub>, aromatic), 2872 (ν<sub>C-H</sub>, aromatic), 2112 (ν<sub>C≡C</sub>), 1746 (ν<sub>C=C</sub>, aromatic), 1693 (ν<sub>C=C</sub>, aromatic).

Compounds **1b**,<sup>3</sup> **1c**,<sup>4</sup> and **1d** were synthesized according to the similar procedure from the reaction of 4-ethynylanisole, 1-ethynylbenzene, and 4-(methoxycarbonyl)phenylacetylene with *trans*-dichlorobis(triethylphosphine)palladium in dichloromethane and diethylamine, respectively.

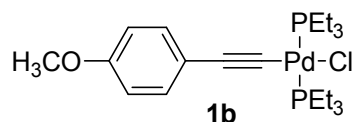

**1b**: <sup>1</sup>H NMR (400 MHz, CDCl<sub>3</sub>, 25 °C): δ 7.19 (d, *J* = 8.8 Hz, 2H, aromatic), 6.78 (d, *J* = 8.8 Hz, 2H, aromatic), 3.78 (s, 3H, OCH<sub>3</sub>), 2.02–1.94 (m, 12H, PCH<sub>2</sub>CH<sub>3</sub>), 1.25–1.17 (m, 18H, PCH<sub>2</sub>CH<sub>3</sub>). <sup>13</sup>C NMR (100 MHz, CDCl<sub>3</sub>, 25 °C): δ 157.81, 131.93, 120.46, 113.79, 105.97, 92.21, 55.38, 15.52, 8.45. <sup>31</sup>P NMR (121.5 MHz, CDCl<sub>3</sub>, 25 °C): δ 17.80. FT-IR (KBr, cm<sup>-1</sup>): 3060 (ν<sub>C-H</sub>, aromatic), 2932 (ν<sub>C-H</sub>, aromatic), 2873 (ν<sub>C-H</sub>, aromatic), 2112 (ν<sub>C≡C</sub>), 1600 (ν<sub>C=C</sub>, aromatic), 1570 (ν<sub>C=C</sub>, aromatic).

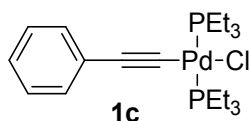

**1c**: <sup>1</sup>H NMR (600 MHz, CDCl<sub>3</sub>, 25 °C): δ 7.27–7.25 (m, 2H, aromatic), 7.24–7.21 (m, 2H, aromatic), 7.16–7.14 (m, 1H, aromatic), 2.00–1.95 (m, 12H, PCH<sub>2</sub>CH<sub>3</sub>), 1.23–1.18 (m, 18H, PCH<sub>2</sub>CH<sub>3</sub>). <sup>13</sup>C NMR (150 MHz, CDCl<sub>3</sub>, 25 °C): δ 130.79, 128.18, 127.95, 125.73, 106.63, 95.16, 15.54, 8.47. <sup>31</sup>P NMR (121.5 MHz, CDCl<sub>3</sub>, 25 °C): δ 17.95. FT-IR (KBr, cm<sup>-1</sup>): 2959 (ν<sub>C-H</sub>, aromatic), 2933 (ν<sub>C-H</sub>, aromatic), 2873 (ν<sub>C-H</sub>, aromatic), 2113 (ν<sub>C≡C</sub>), 1750 (ν<sub>C=C</sub>, aromatic), 1650 (ν<sub>C=C</sub>, aromatic).

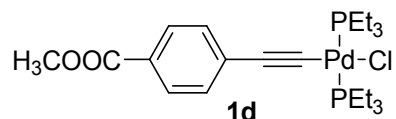

**1d**: M.P.: 49.6–50.3 °C. <sup>1</sup>H NMR (400 MHz, CDCl<sub>3</sub>, 25 °C): δ 7.90 (d, *J* = 8.4 Hz, 2H, aromatic), 7.28 (d, *J* = 8.4 Hz, 2H, aromatic), 3.89 (s, 3H, COOCH<sub>3</sub>), 1.99–1.96 (m, 12H, PCH<sub>2</sub>CH<sub>3</sub>), 1.25–1.17 (m,

18H, PCH<sub>2</sub>CH<sub>3</sub>). <sup>13</sup>C NMR (150 MHz, CDCl<sub>3</sub>, 25 °C): δ 166.97, 132.60, 130.49, 129.45, 126.83, 106.66, 101.73, 52.07, 15.40, 8.38. <sup>31</sup>P NMR (121.5 MHz, CDCl<sub>3</sub>, 25 °C): δ 18.30. FT-IR (KBr, cm<sup>-1</sup>): 2970 (ν<sub>C-H</sub>, aromatic), 2930 (ν<sub>C-H</sub>, aromatic), 2870 (ν<sub>C-H</sub>, aromatic), 2110 (ν<sub>C≡C</sub>), 1720 (ν<sub>C=O</sub>). HRMS *m/z* calcd for C<sub>22</sub>H<sub>37</sub>ClO<sub>2</sub>P<sub>2</sub>Pd [M]<sup>+</sup>: 536.0992; Found: C<sub>22</sub>H<sub>37</sub>ClO<sub>2</sub>P<sub>2</sub>Pd, 536.0990. Anal. Calcd (%) for C<sub>22</sub>H<sub>37</sub>ClO<sub>2</sub>P<sub>2</sub>Pd (536.10): C, 49.17; H, 6.94; Found: C, 49.00; H, 7.19.

**Typical Polymerization Procedure of 1a–d with 2a (poly-a2a<sub>100</sub>):** A 10 mL oven-dried flask was charged with monomer **2a** (50.0 mg, 0.17 mmol), THF (0.87 mL) and a stir bar. To this stirring solution was added a solution of **1a** in THF (0.017 M, 0.10 mL) *via* a microsyringe at ambient temperature. The concentrations of monomer **2a** and initiator **1a** were 0.20 and 0.002 M, respectively ([**2a**]<sub>0</sub>/[**1a**]<sub>0</sub> = 100). The reaction flask was then immersed into an oil bath at 55 °C and stirred for 10 h. After cooled to room temperature, the polymerization solution was precipitated into a large amount of methanol, collected by centrifugation, and dried in vacuum at room temperature overnight to give poly-a**2a**<sub>100</sub> (45.0 mg, 91% yield). SEC: *M*<sub>n</sub> = 3.1 × 10<sup>4</sup>, *M*<sub>w</sub>/*M*<sub>n</sub> = 1.10. <sup>1</sup>H NMR (400 MHz, CDCl<sub>3</sub>, 25 °C): δ 7.48–7.24 (br, aromatic), 4.58–3.42 (br, OCH<sub>2</sub>), 1.75–0.73 (br, CH<sub>2</sub> and CH<sub>3</sub>). <sup>13</sup>C NMR (150 MHz, CDCl<sub>3</sub>, 25 °C): δ 165.11, 162.70, 150.50, 129.79, 127.38, 117.19, 65.03, 32.03, 29.74, 29.58, 29.46, 28.76, 26.13, 22.78, 14.19. FT-IR (KBr, cm<sup>-1</sup>): 2952 (ν<sub>C-H</sub>, aromatic), 2919 (ν<sub>C-H</sub>, aromatic), 2852 (ν<sub>C-H</sub>, aromatic), 2190 (ν<sub>C≡C</sub>), 1720 (ν<sub>C=O</sub>), 1599 (ν<sub>C=N</sub>).

**Typical Procedure Used to Grow Poly(phenyl isocyanide)s of Various Molecular Weights from Palladium Complex 1a–d.** Various amounts of palladium complex **1a** in THF ([**1a**]<sub>0</sub> = 0.002 M) were added *via* a microsyringe to a series solutions of isocyanide monomer **2a** (50.0 mg, 0.17mmol) in THF. The concentration of **2a** was 0.20 M. The initial feed ratios of **2a** to **1a** were 25, 40, 55, 70, 85, and 100,

respectively. Each of the reaction mixtures were then stirred for 10 h at 55 °C and quenched by the addition of a large amount of methanol, collected by centrifugation, washed with methanol, and dried under vacuum to afford the expected polymers. The  $M_n$  and  $M_w/M_n$  of these polymers were characterized by SEC (Fig. 1a in maintext).

**Typical Kinetic Study of the Polymerization of 2a with 1a-d.** A mixture of **2a** (100.0 mg, 0.35 mmol) and a standard polystyrene ( $M_n = 2630$ , 50.0 mg for **1a**, and **1c**, 40.0 mg for **1b**, and **1d**) were placed in a dry ampule, and dry THF (1.36 mL) was added by a syringe. To this was added a solution of **1a** in THF (15  $\mu$ M, 0.39 mL) *via* a microsyringe at ambient temperature. The concentrations of **1a** and **2a** were 0.0033 and 0.2 M, respectively. The mixture was then heated to 55 °C ( $[2a]_0 = 0.2$  M,  $[2a]_0/[1a]_0 = 60$ ). The conversion of **2a** was followed by measuring the SEC of the reaction mixture at appropriate time intervals. The peak area of the unreacted **2a** relative to that of the internal standard (PSt) was used for the determination of the conversion of **2a** on the basis of the linear calibration curve. The  $M_n$  and  $M_w/M_n$  were estimated by SEC and reported as equivalent to standard polystyrene.

## References

1. (a) Y.-X. Xue, Y.-Y. Zhu, L.-M. Gao, X.-Y. He, N. Liu, W.-Y. Zhang, J. Yin, Y.-S. Ding, H.-P. Zhou and Z.-Q. Wu, *J. Am. Chem. Soc.*, 2014, **136**, 4706; (b) J. Liang, Z. Chen, J. Yin, G.-A. Yu and S. H. Liu, *Chem. Commun.*, 2013, **49**, 3567.
2. K. Osakada, T. Takizawa and T. Yamamoto, *Organometallics*, 2006, **14**, 3531.
3. K. Onitsuka, H. Ogawa, T. Joh, S. Takahashi, Y. Yamamoto and H. Yamazaki, *J. Chem. Soc., Dalton Trans.: Inorg. Chem.*, 1991, **6**, 1531.

4. Y.-J. Kim, S.-H. Lee, S. I. Jeon, M. S. Lim and S. W. Lee, *Inorg. Chim. Acta*, 2005, **358**, 650.

**Table S1. Polymerization Results of 2b–e with 1b as Initiator ( $[2]_0 = 0.2 \text{ M}$ )<sup>a</sup>**

| Run | Monomer   | $[2]_0/[1b]_0$ <sup>b</sup> | Solvent | <i>T</i> | Polymer                         | $M_n$ <sup>c</sup> | $M_w/M_n$ <sup>c</sup> | Yield <sup>d</sup> |
|-----|-----------|-----------------------------|---------|----------|---------------------------------|--------------------|------------------------|--------------------|
| 1   | <b>2b</b> | 50                          | THF     | 55 °C    | poly- <b>b2b</b> <sub>50</sub>  | Oligomers          | --                     | --                 |
| 2   | <b>2c</b> | 25                          | Toluene | 90 °C    | poly- <b>b2c</b> <sub>25</sub>  | $5.6 \times 10^3$  | 1.22                   | 90%                |
| 3   | <b>2c</b> | 30                          | Toluene | 90 °C    | poly- <b>b2c</b> <sub>30</sub>  | $6.8 \times 10^3$  | 1.22                   | 91%                |
| 4   | <b>2c</b> | 60                          | Toluene | 90 °C    | poly- <b>b2c</b> <sub>60</sub>  | $1.4 \times 10^4$  | 1.27                   | 87%                |
| 5   | <b>2d</b> | 50                          | THF     | 55 °C    | poly- <b>b2d</b> <sub>50</sub>  | $1.7 \times 10^4$  | 1.18                   | 97%                |
| 6   | <b>2d</b> | 100                         | THF     | 55 °C    | poly- <b>b2d</b> <sub>100</sub> | $3.4 \times 10^4$  | 1.22                   | 95%                |
| 7   | <b>2e</b> | 50                          | THF     | 55 °C    | poly- <b>b2e</b> <sub>50</sub>  | $1.3 \times 10^4$  | 1.16                   | 97%                |
| 8   | <b>2e</b> | 100                         | THF     | 55 °C    | poly- <b>b2e</b> <sub>100</sub> | $2.7 \times 10^4$  | 1.15                   | 93%                |

<sup>a</sup>The polymers were synthesized according to Scheme 1 in main text. <sup>b</sup>The initial feed ratio of monomer to initiator. <sup>c</sup>The  $M_n$  and  $M_w/M_n$  were determined by SEC and reported as equivalent to standard polystyrene. <sup>d</sup>Isolated yield.

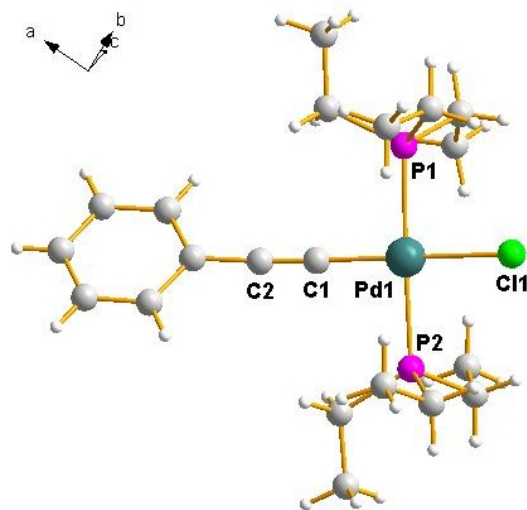

**Fig. S1** Single crystal structure of Pd(II) complex **1c**. Hydrogen atoms are omitted for clarity. Selected bond lengths (Å) and angles (deg): C1–C2, 1.210(5); C1–Pd, 1.947(4); Cl1–Pd, 2.3512(8); P1–Pd,



2.3136(10); P2-Pd, 2.3055(10); C1-Pd-P2, 90.58(12); C1-Pd-P2, 90.48(12); P2-Pd-P1, 176.92(5);  
C1-Pd-C11, 177.71(17); P2-Pd-C11, 89.10(4); P1-Pd-C11, 89.95(4).

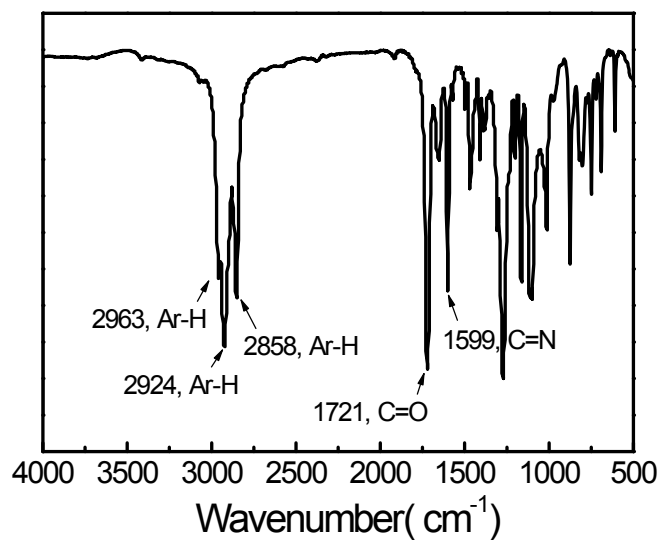

**Fig. S2** FT-IR spectrum of poly-a2a<sub>100</sub> measured at 25 °C using KBr pellets.

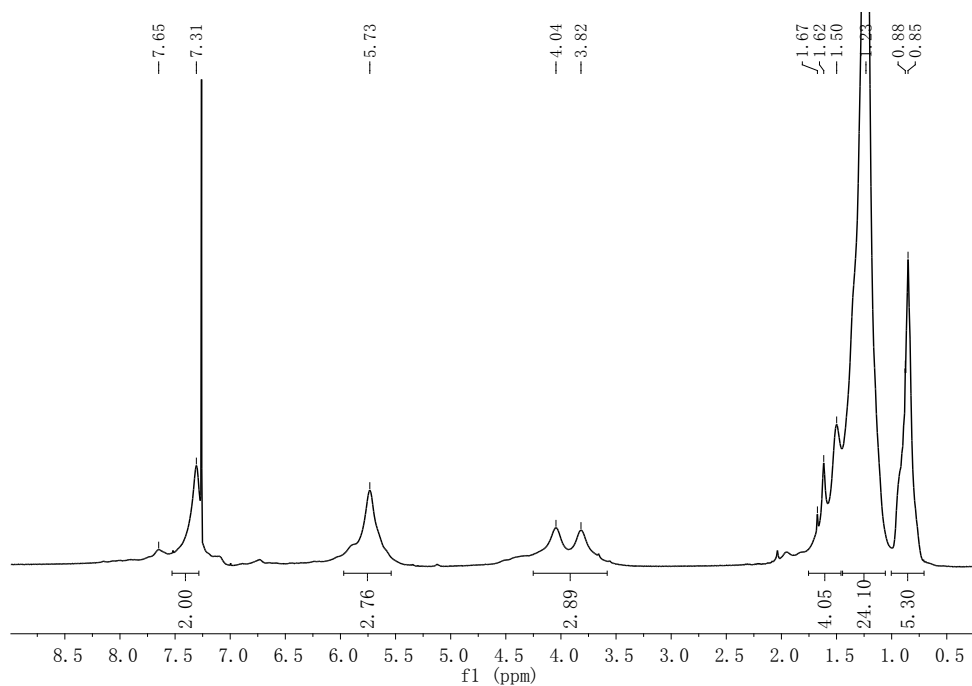

**Fig. S3**  $^1\text{H}$  NMR spectrum of poly-**a2a**<sub>100</sub> measured in  $\text{CDCl}_3$  at 25 °C (400 MHz).

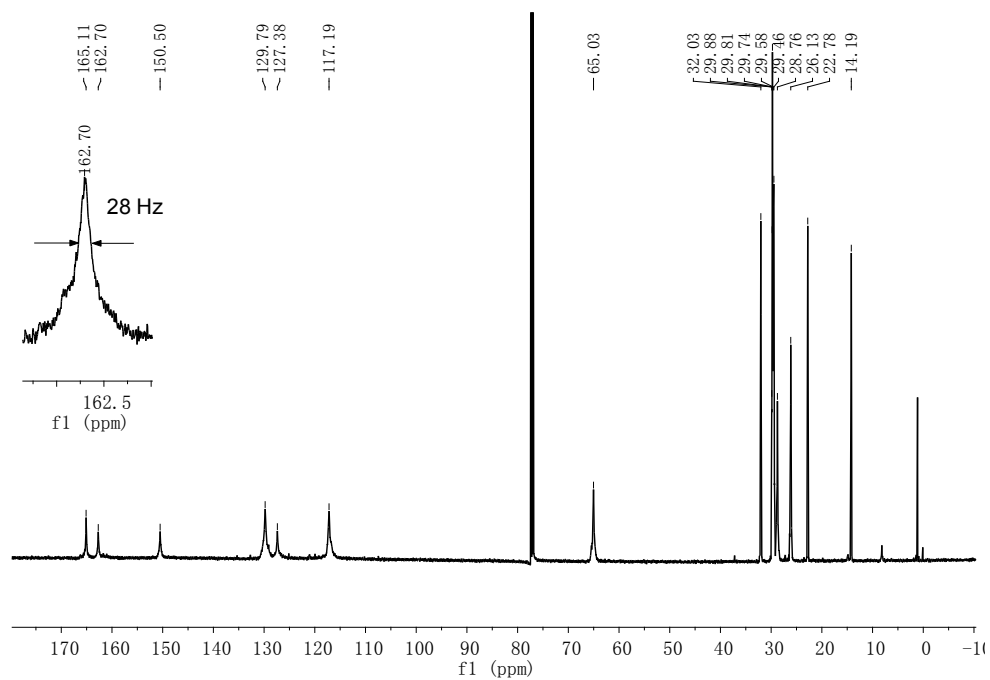

**Fig. S4**  $^{13}\text{C}$  NMR spectrum of poly-**a2a**<sub>100</sub> measured in  $\text{CDCl}_3$  at 25 °C (150 MHz).

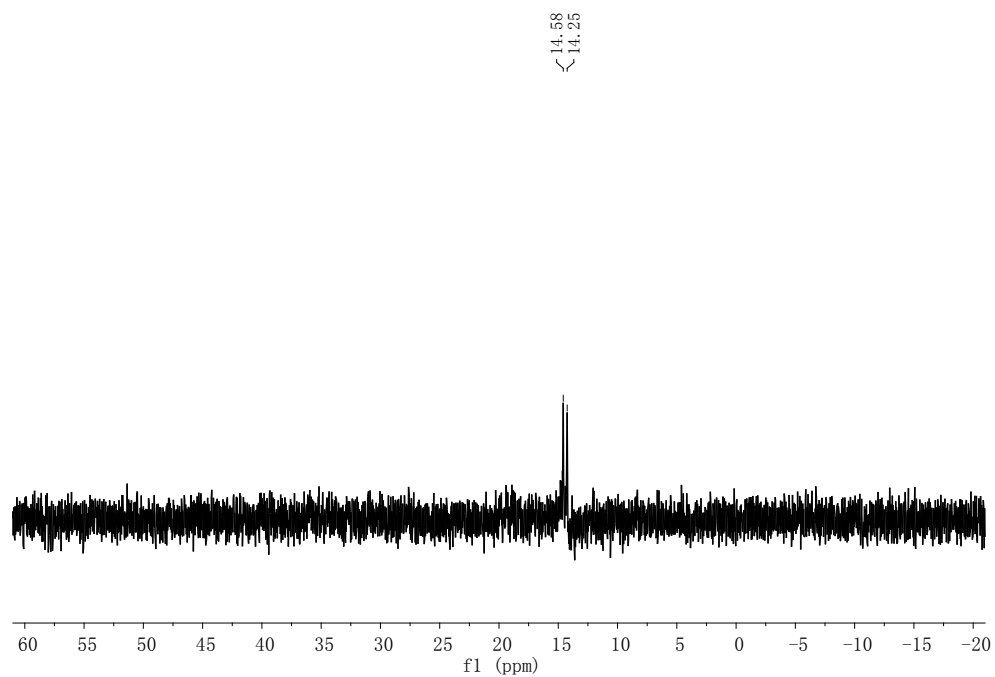

**Fig. S5**  $^{31}\text{P}$  NMR spectrum of poly-**a2a**<sub>100</sub> measured in  $\text{CDCl}_3$  at 25 °C (121.5 MHz).

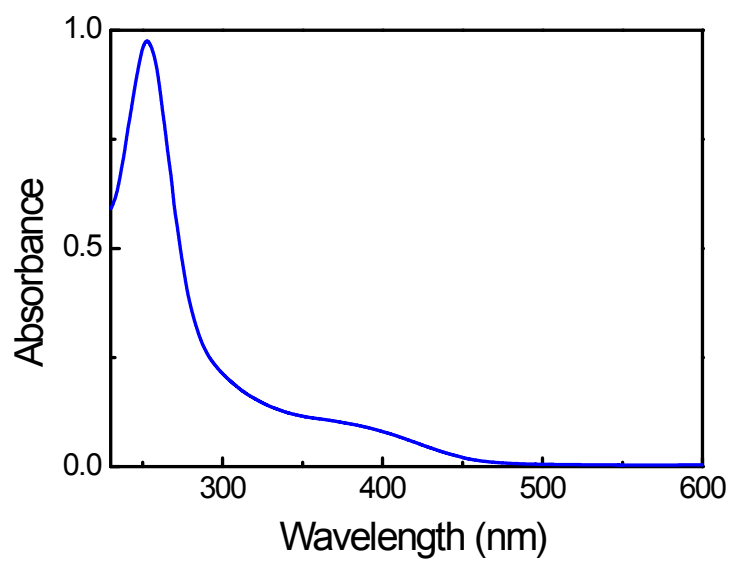

**Fig. S6** UV-vis spectrum of poly-**a2a**<sub>100</sub> measured in  $\text{CHCl}_3$  at 25 °C.

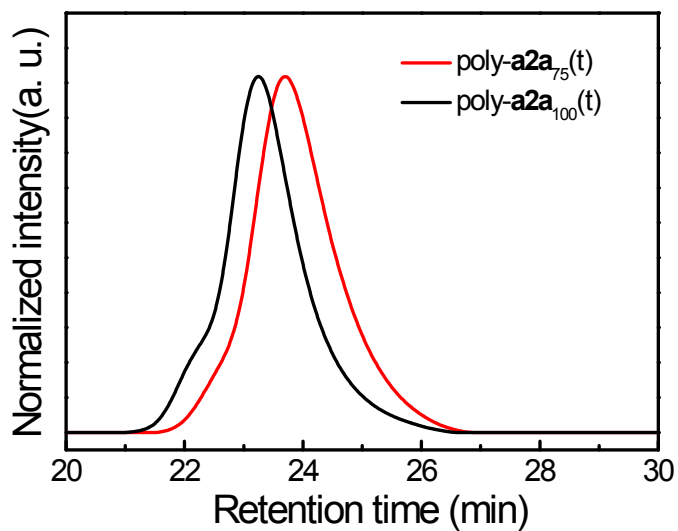

**Fig. S7** SEC chromatograms of poly-**a2a**<sub>75</sub>(t) and poly-**a2a**<sub>100</sub>(t) prepared from **2a** with **1a** as initiator in toluene at 55°C.

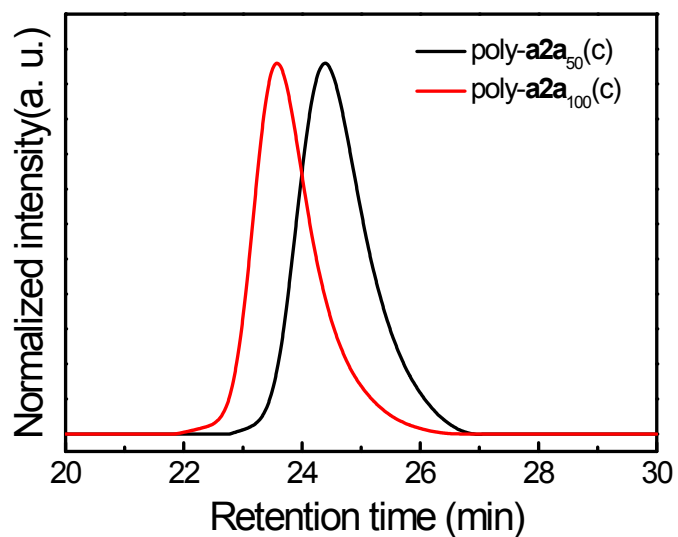

**Fig. S8** SEC chromatograms of poly-**a2a**<sub>50</sub>(c) and poly-**a2a**<sub>80</sub>(c) prepared from **2a** with **1a** as initiator in CHCl<sub>3</sub> at 55 °C.

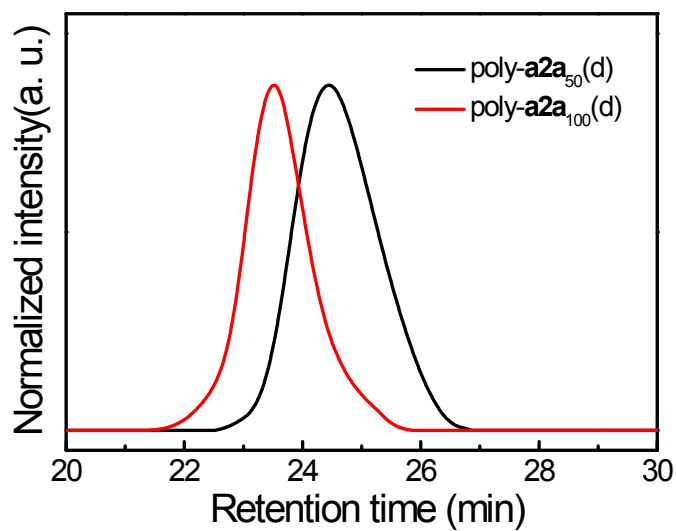

**Fig. S9** SEC chromatograms of poly-a2a<sub>50</sub>(d) and poly-a2a<sub>80</sub>(d) prepared from **2a** with **1a** as initiator in DMF at 55 °C.

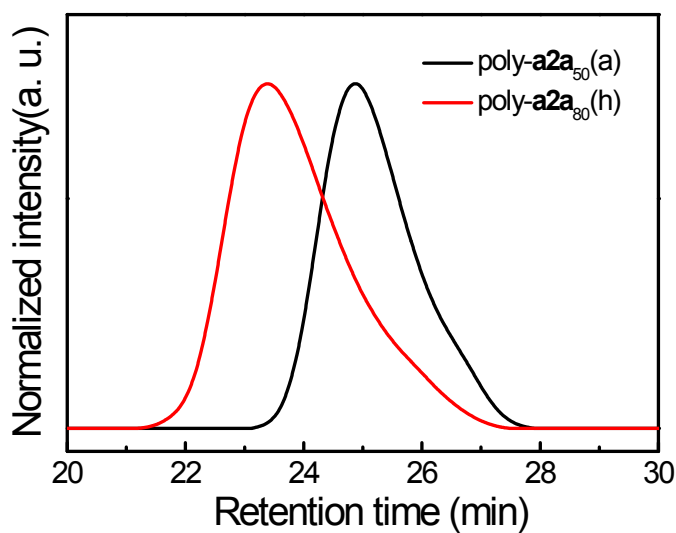

**Fig. S10** SEC chromatograms of poly-a2a<sub>50</sub>(a) and poly-a2a<sub>80</sub>(h) prepared from **2a** with **1a** as initiator in acetone and hexane at 55 °C.

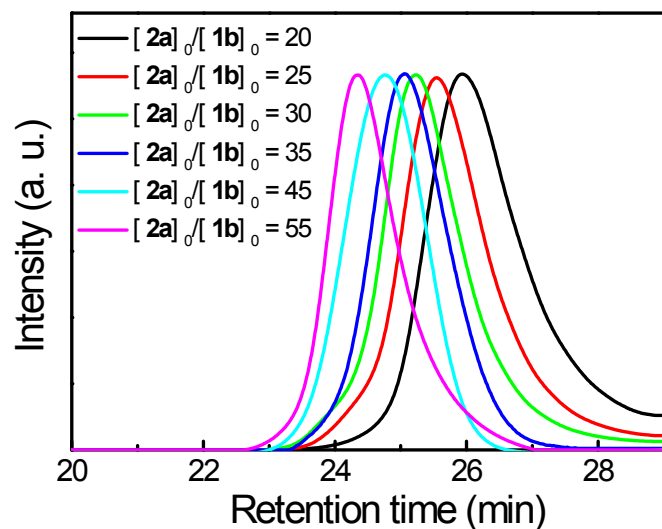

**Fig. S11** SEC chromatograms of poly-**b2a<sub>m</sub>** prepared from **2a** with **1b** as initiator in THF at 55 °C with different initial feed ratios.

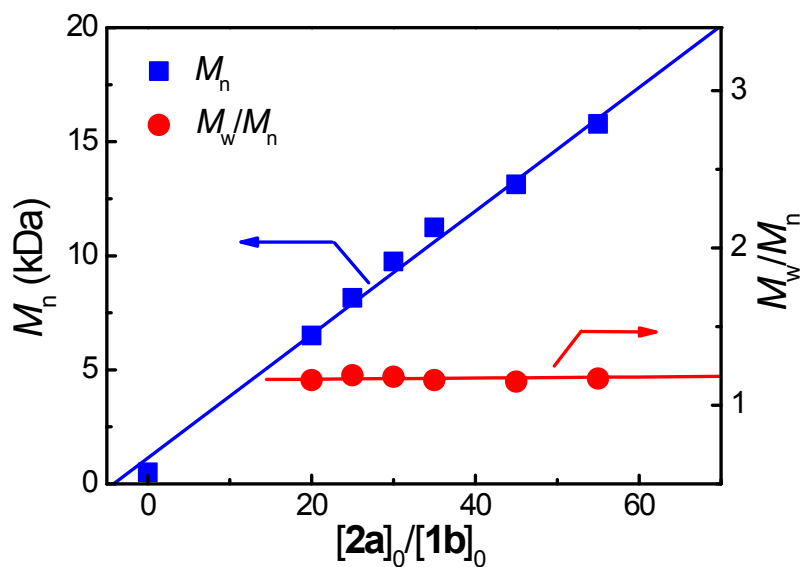

**Fig. S12** Plot of  $M_n$  and  $M_w/M_n$  values of poly-**b2a<sub>m</sub>** as a function of the initial feed ratios of **2a** to **1b**.  $M_n$  and  $M_w/M_n$  were determined by SEC with polystyrene standard (SEC conditions: eluent = THF, temperature = 40 °C).

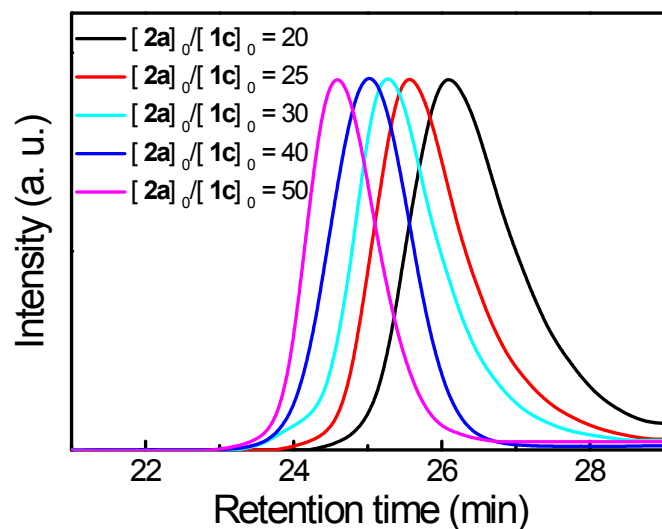

**Fig. S13** SEC chromatograms of poly-**c2a<sub>m</sub>** prepared from **2a** with **1c** as initiator in THF at 55 °C with different initial feed ratios.

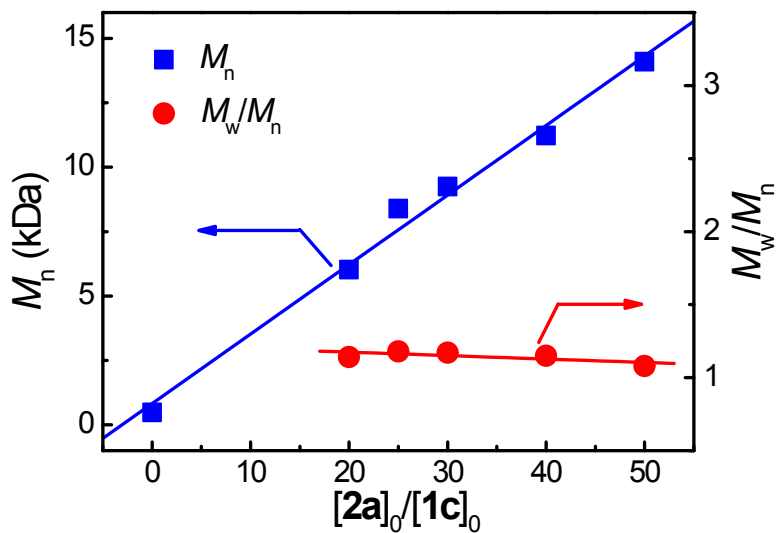

**Fig. S14** Plot of  $M_n$  and  $M_w/M_n$  values of poly-**c2a<sub>m</sub>** as a function of the initial feed ratios of **2a** to **1c**.  $M_n$  and  $M_w/M_n$  were determined by SEC with polystyrene standard (SEC conditions: eluent = THF, temperature = 40 °C).

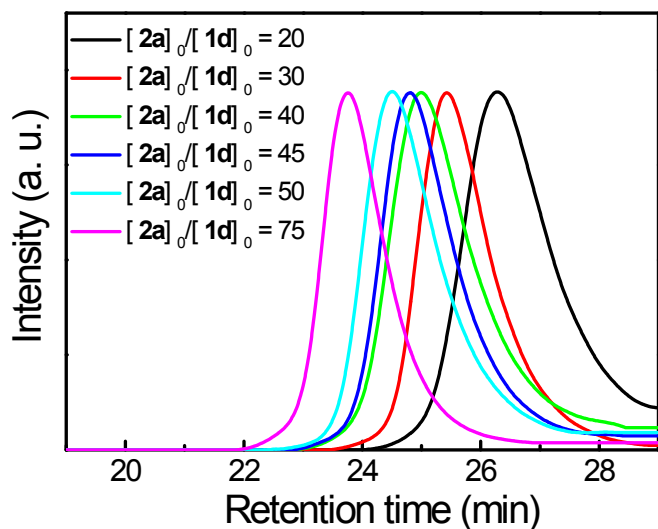

**Fig. S15** SEC chromatograms of poly-**d2a<sub>m</sub>** prepared from **2a** with **1d** as initiator in THF at 55 °C with different initial feed ratios.

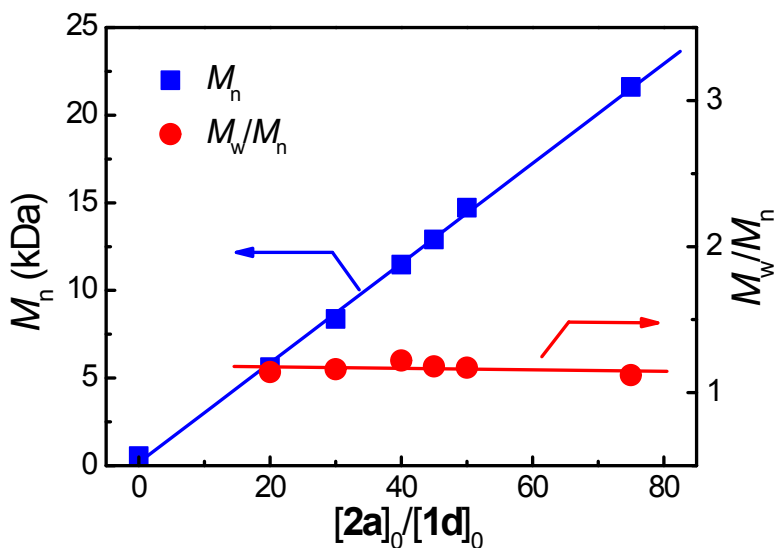

**Fig. S16** Plot of  $M_n$  and  $M_w/M_n$  values of poly-**d2a<sub>m</sub>** as a function of the initial feed ratios of **2a** to **1d**.  $M_n$  and  $M_w/M_n$  were determined by SEC with polystyrene standard (SEC conditions: eluent = THF, temperature = 40 °C).



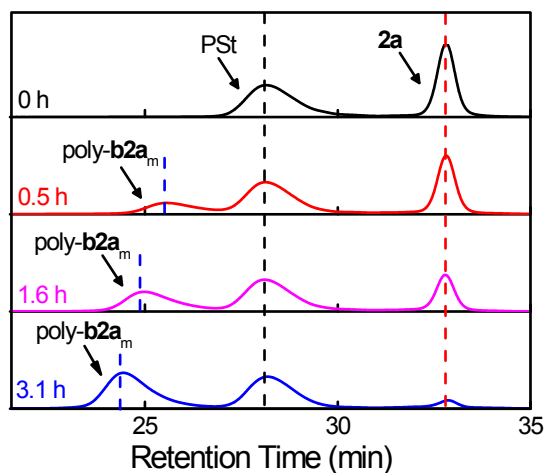

**Fig. S17** Time-dependent SEC chromatograms for **1b**-initiated polymerization of **2a** in THF at 55 °C with PSt ( $M_n = 2630$ ,  $M_w/M_n = 1.06$ ) as internal standard ( $[2a]_0 = 0.2$  M,  $[2a]_0/[1b]_0 = 60$ ).

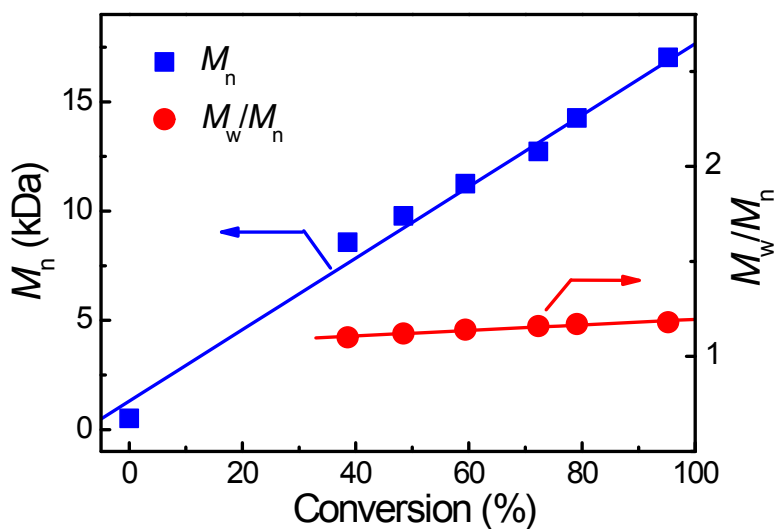

**Fig. S18** Plot of  $M_n$  and  $M_w/M_n$  values as a function of conversion of **2a** with **1b** as initiator in THF at 55 °C ( $[2a]_0 = 0.2$  M,  $[2a]_0/[1b]_0 = 60$ ).

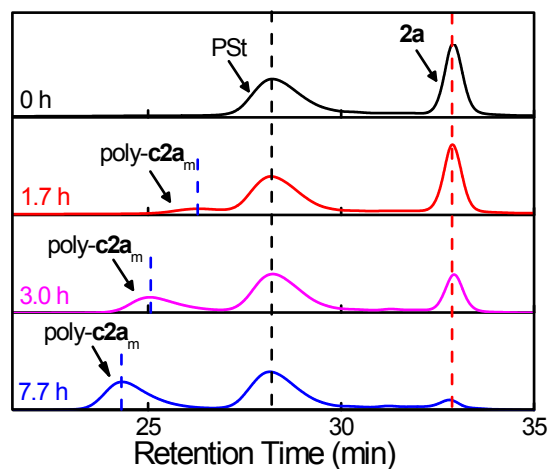

**Fig. S19** Time-dependent SEC chromatograms for **1c**-initiated polymerization of **2a** in THF at 55 °C with PSt ( $M_n = 2630$ ,  $M_w/M_n = 1.06$ ) as internal standard ( $[2a]_0 = 0.2$  M,  $[2a]_0/[1c]_0 = 60$ ).

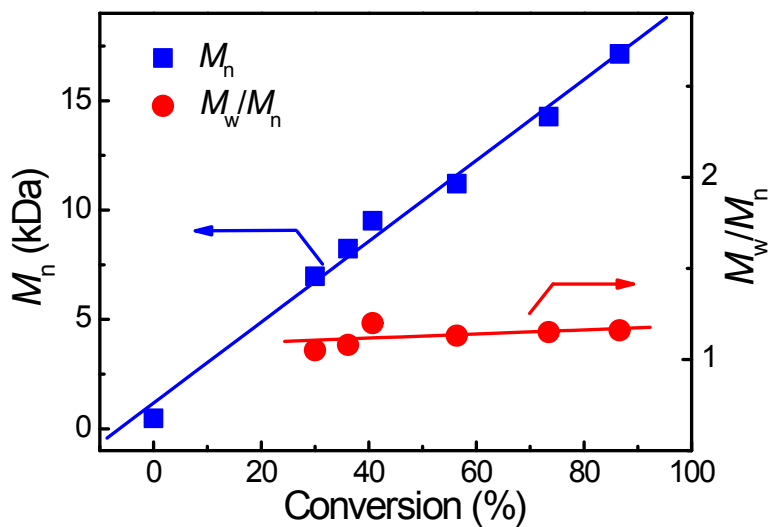

**Fig. S20** Plot of  $M_n$  and  $M_w/M_n$  values as a function of conversion of **2a** with **1c** as initiator in THF at 55 °C ( $[2a]_0 = 0.2$  M,  $[2a]_0/[1c]_0 = 60$ ).

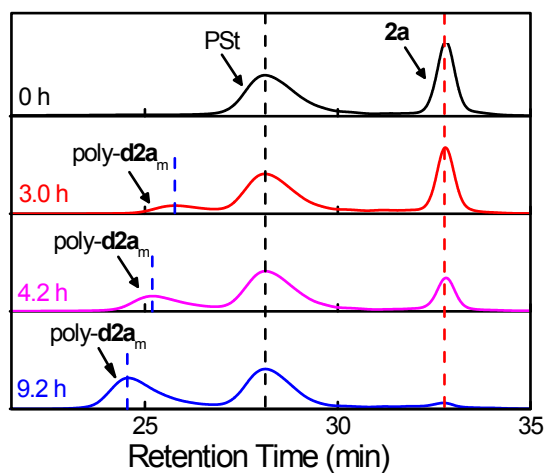

**Fig. S21** Time-dependent SEC chromatograms for **1d**-initiated polymerization of **2a** in THF at 55 °C with PSt ( $M_n = 2630$ ,  $M_w/M_n = 1.06$ ) as internal standard ( $[2a]_0 = 0.2$  M,  $[2a]_0/[1d]_0 = 60$ ).

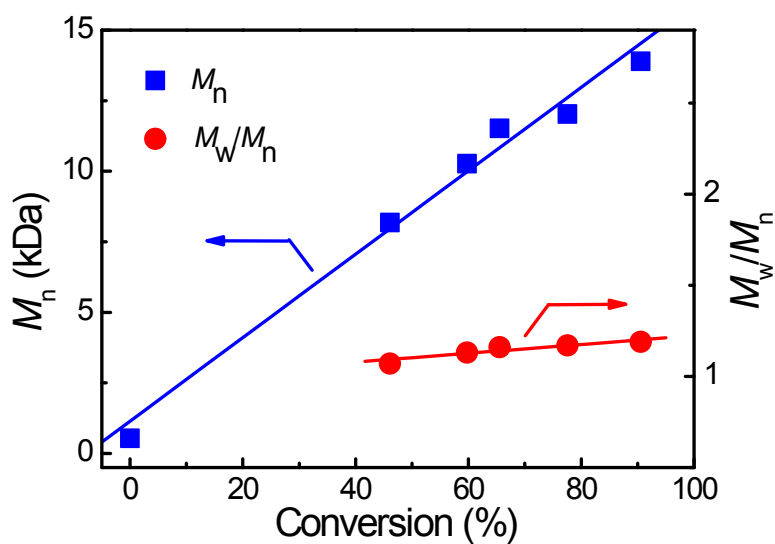

**Fig. S22** Plot of  $M_n$  and  $M_w/M_n$  values as a function of conversion of **2a** with **1d** as initiator in THF at 55 °C ( $[2a]_0 = 0.2$  M,  $[2a]_0/[1d]_0 = 60$ ).

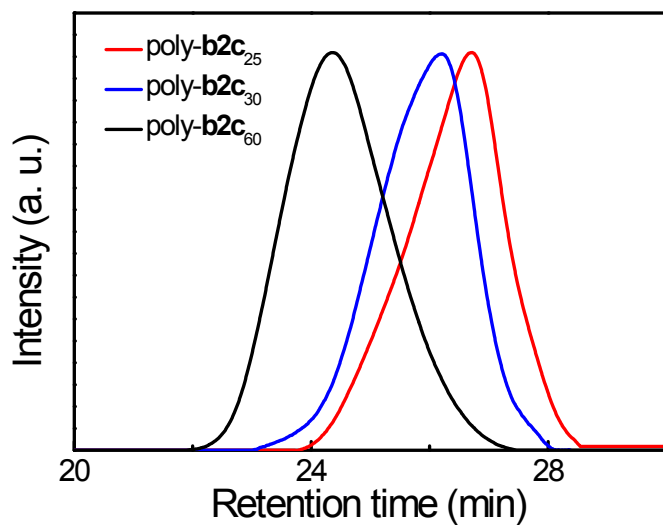

**Fig. S23** SEC chromatograms of poly-b2c<sub>25</sub>, poly-b2c<sub>30</sub>, and poly-b2c<sub>60</sub> prepared from **2c** with **1b** as initiator in toluene at 90 °C.

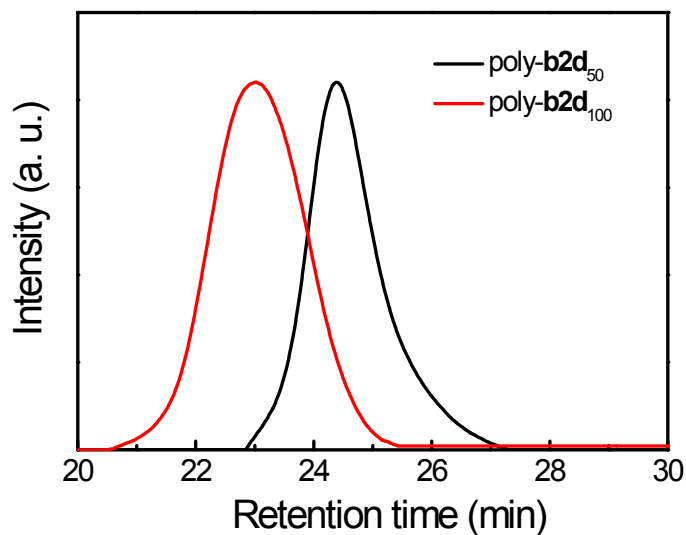

**Fig. S24** SEC chromatograms of poly-b2d<sub>50</sub> and poly-b2d<sub>100</sub> prepared from **2d** with **1b** as initiator in THF at 55 °C.

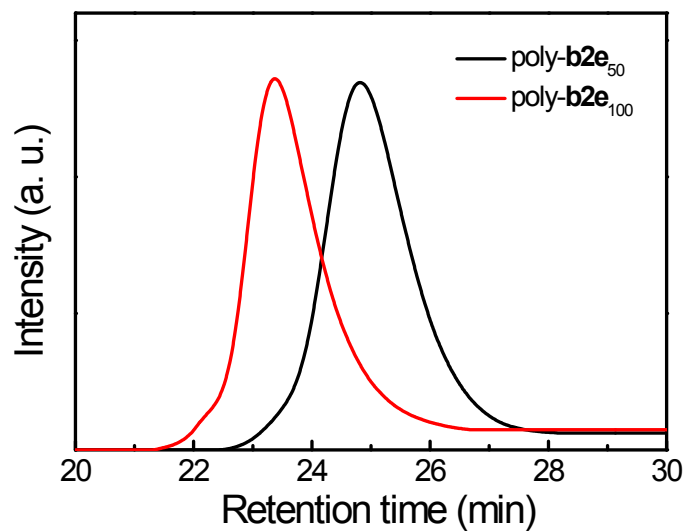

**Fig. S25** SEC chromatograms of poly-b2e<sub>50</sub> and poly-b2e<sub>100</sub> prepared from **2e** with **1b** as initiator in THF at 55 °C.

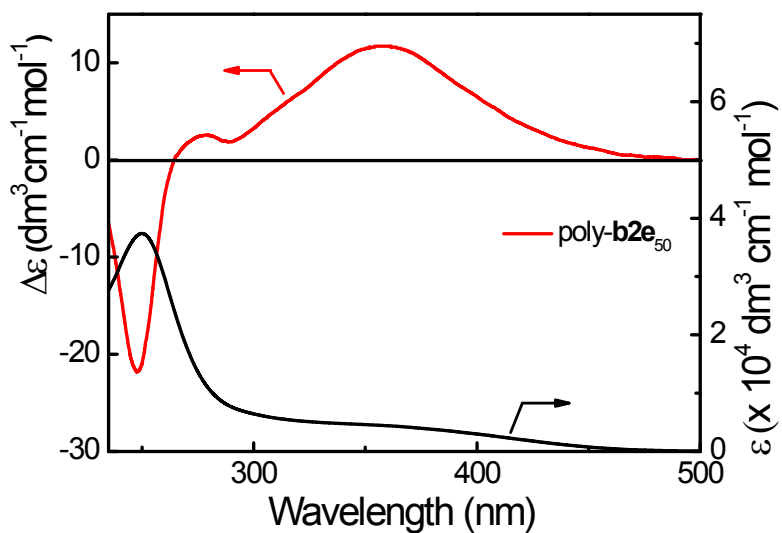

**Fig. S26** CD and UV-vis spectra of poly-b2e<sub>50</sub> measured in THF at room temperature.

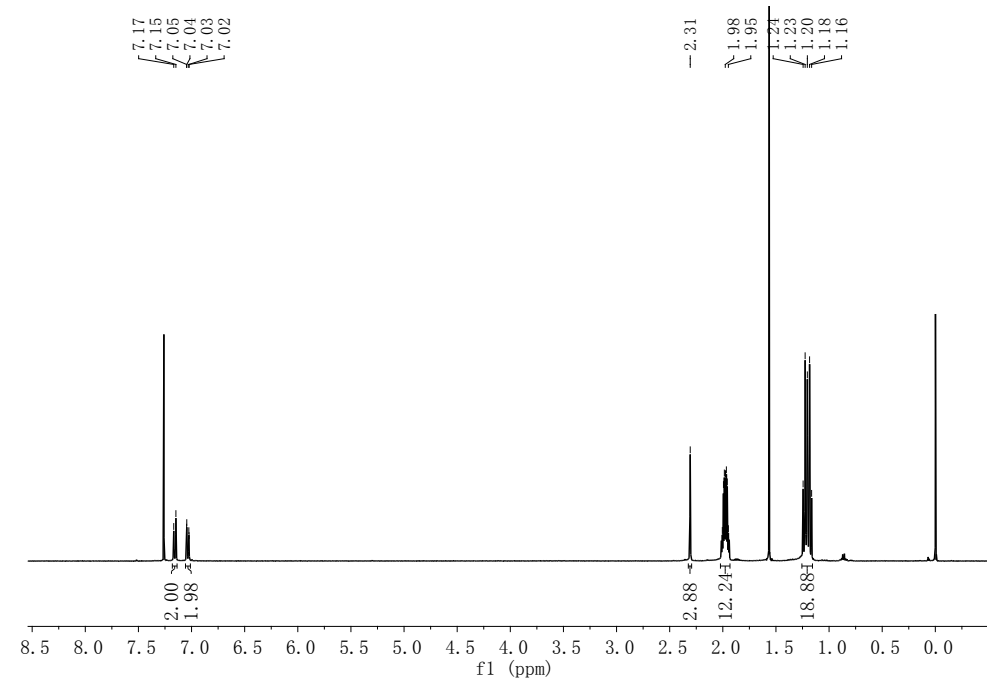

**Fig. S27**  $^1\text{H}$  NMR spectrum of **1a** measured in  $\text{CDCl}_3$  at 25 °C (400 MHz).

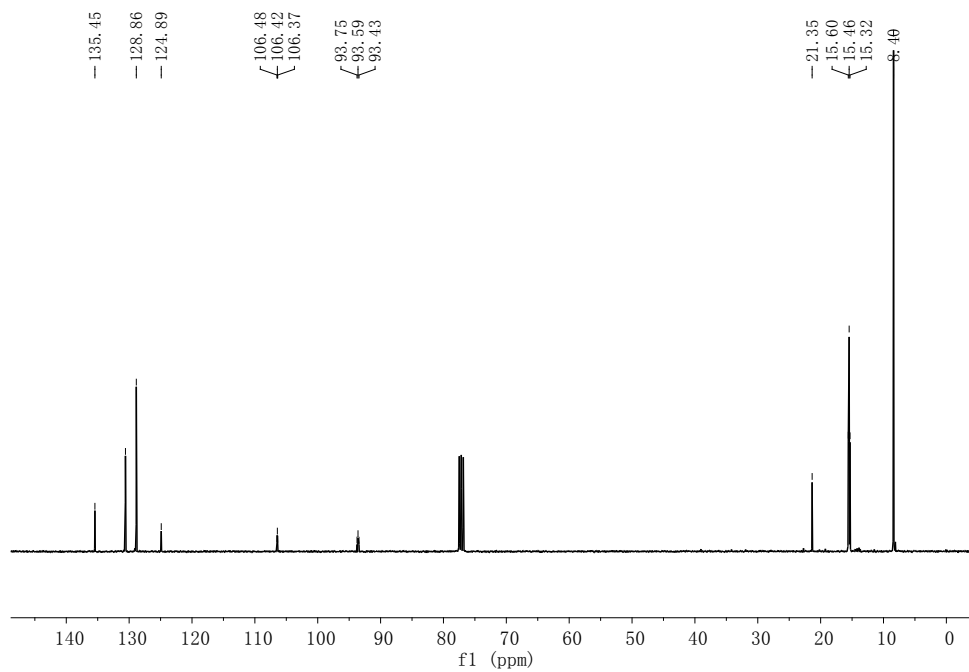

**Fig. S28**  $^{13}\text{C}$  NMR spectrum of **1a** measured in  $\text{CDCl}_3$  at 25 °C (100 MHz).

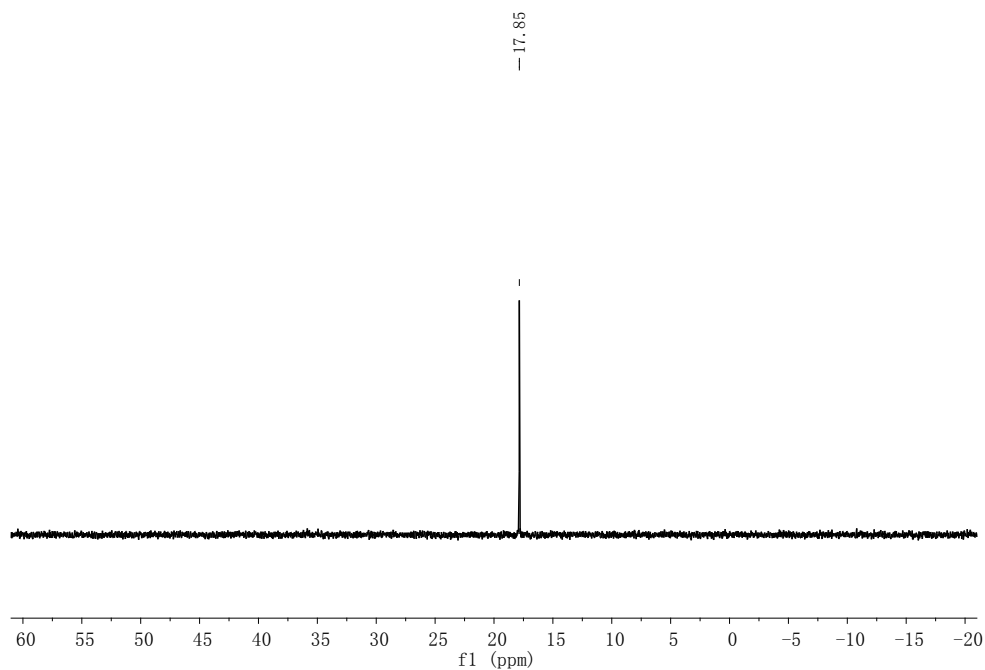

**Fig. S29**  $^{31}\text{P}$  NMR spectrum of **1a** measured in  $\text{CDCl}_3$  at 25 °C (121.5 MHz).

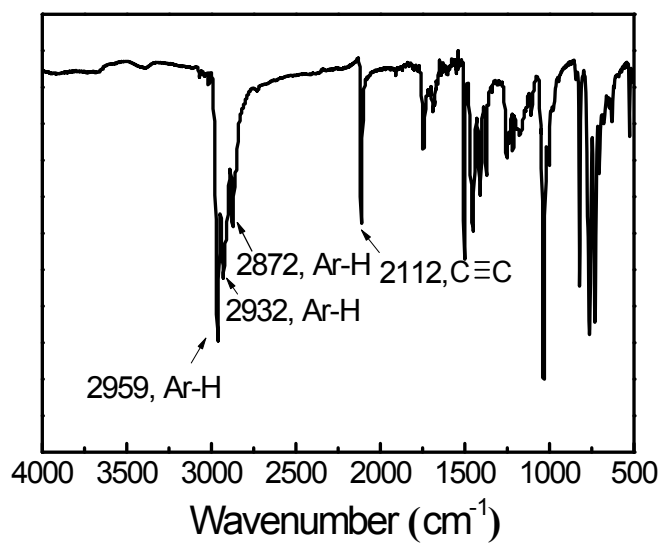

**Fig. S30** FT-IR spectrum of **1a** measured at 25 °C using KBr pellets.

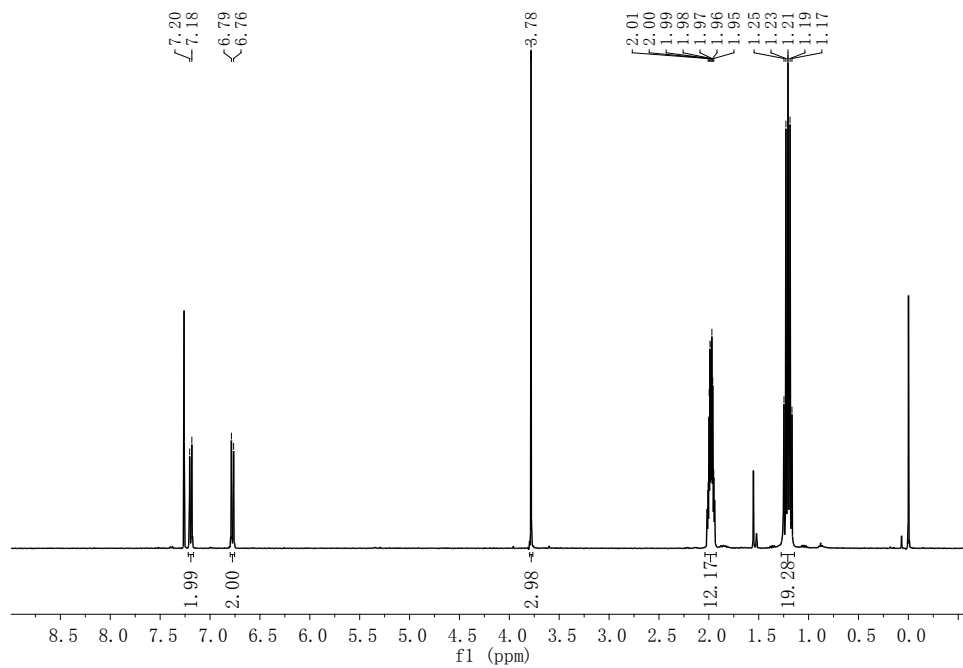

**Fig. S31**  $^1\text{H}$  NMR spectrum of **1b** measured in  $\text{CDCl}_3$  at 25 °C (400 MHz).

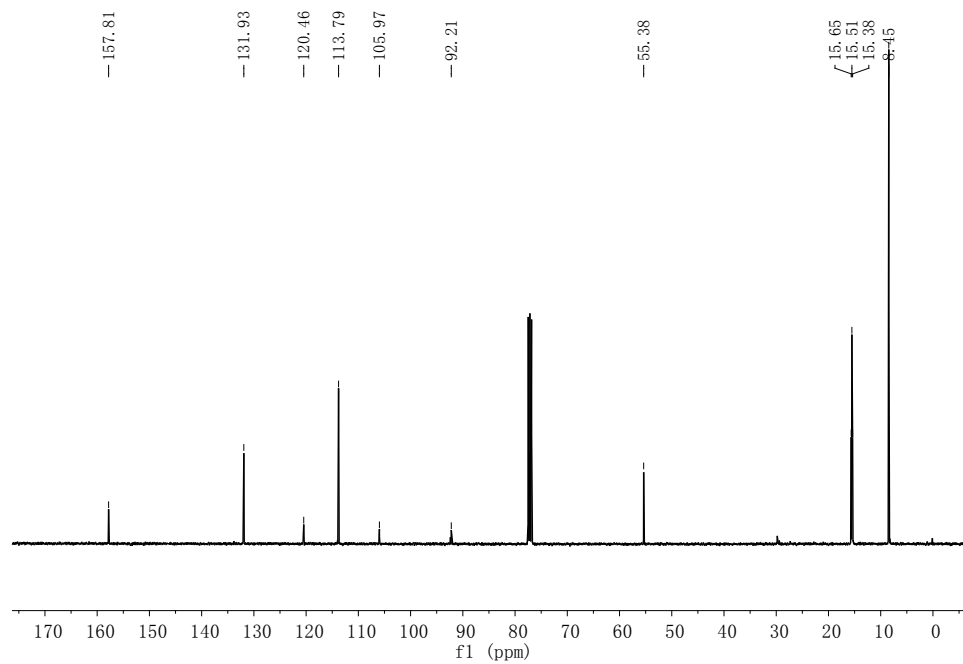

**Fig. S32**  $^{13}\text{C}$  NMR spectrum of **1b** measured in  $\text{CDCl}_3$  at 25 °C (100 MHz).



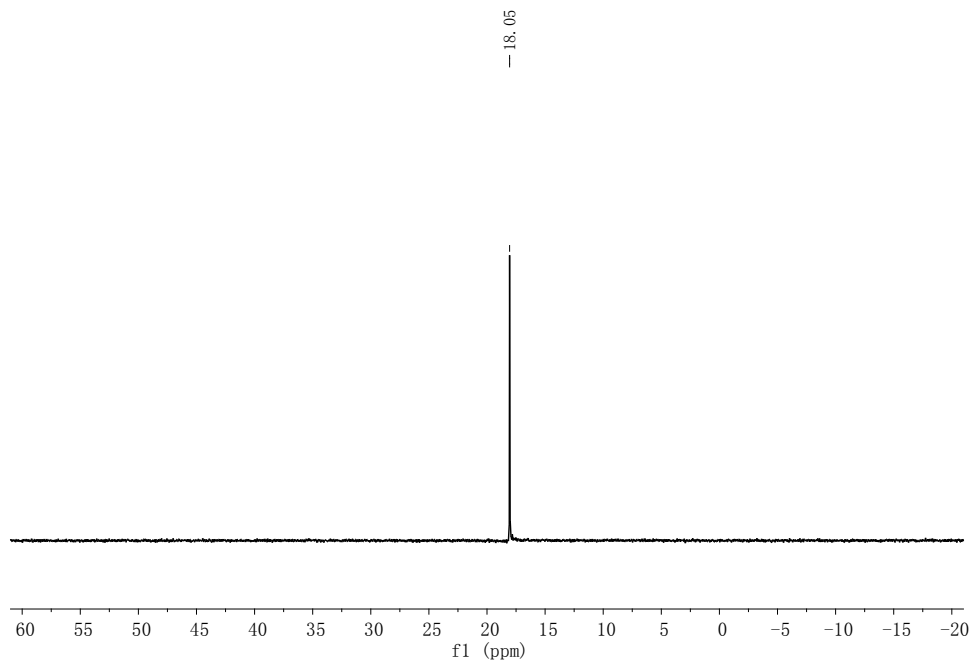

**Fig. S33**  $^{31}\text{P}$  NMR spectrum of **1b** measured in  $\text{CDCl}_3$  at  $25\text{ }^\circ\text{C}$  (121.5 MHz).

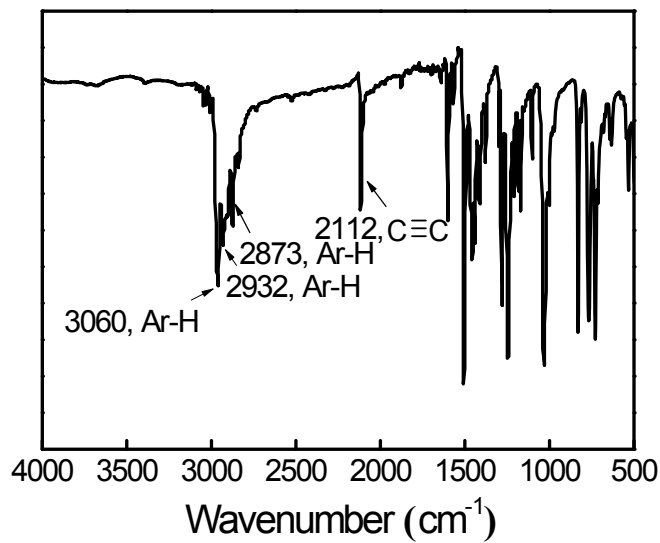

**Fig. S34** FT-IR spectrum of **1b** measured at  $25\text{ }^\circ\text{C}$  using KBr pellets.

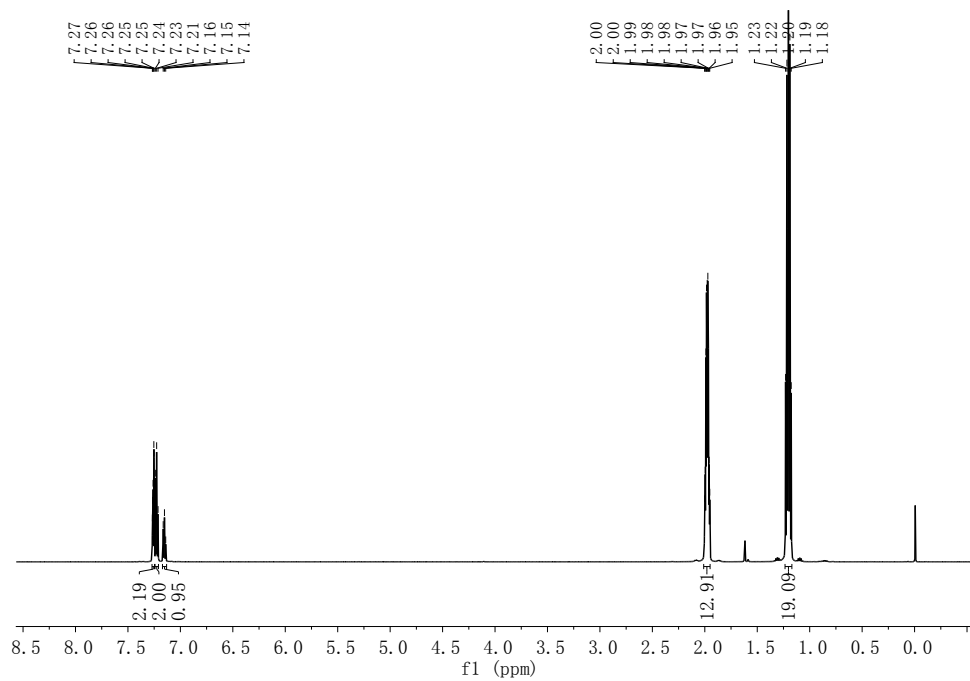

**Fig. S35**  $^1\text{H}$  NMR spectrum of **1c** measured in  $\text{CDCl}_3$  at 25 °C (600 MHz).

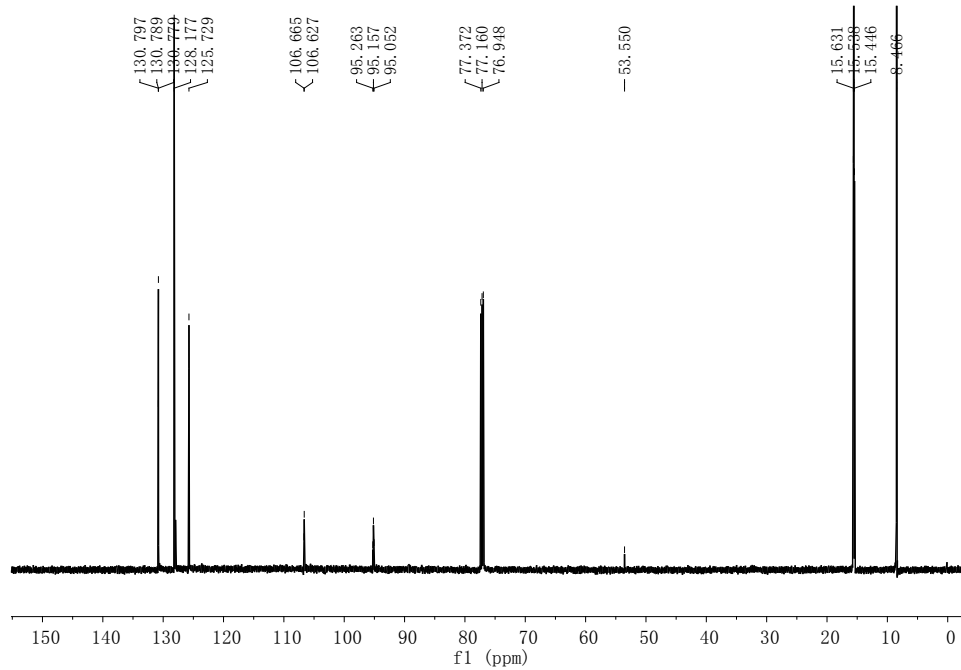

**Fig. S36**  $^{13}\text{C}$  NMR spectrum of **1c** measured in  $\text{CDCl}_3$  at 25 °C (150 MHz).

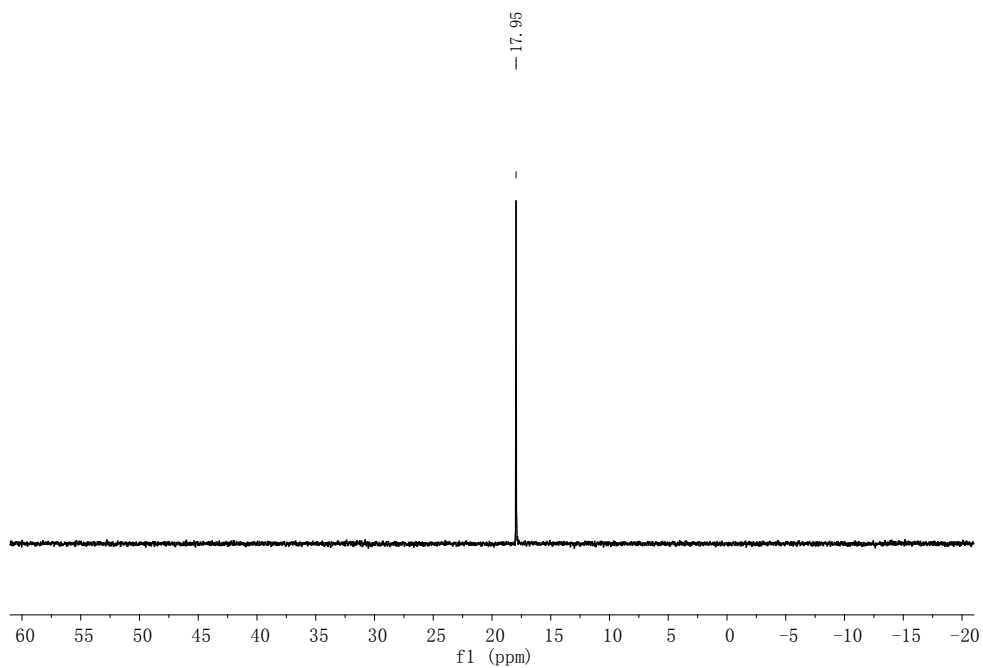

**Fig. S37**  $^{31}\text{P}$  NMR spectrum of **1c** measured in  $\text{CDCl}_3$  at  $25\text{ }^\circ\text{C}$  (121.5 MHz).

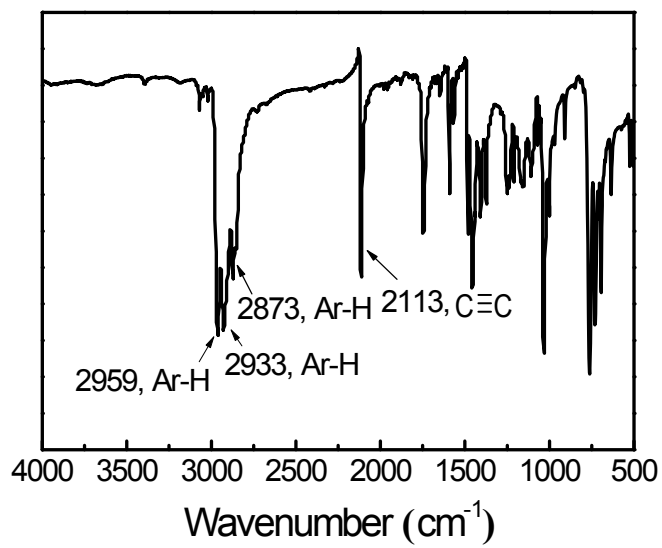

**Fig. S38** FT-IR spectrum of **1c** measured at  $25\text{ }^\circ\text{C}$  using KBr pellets.

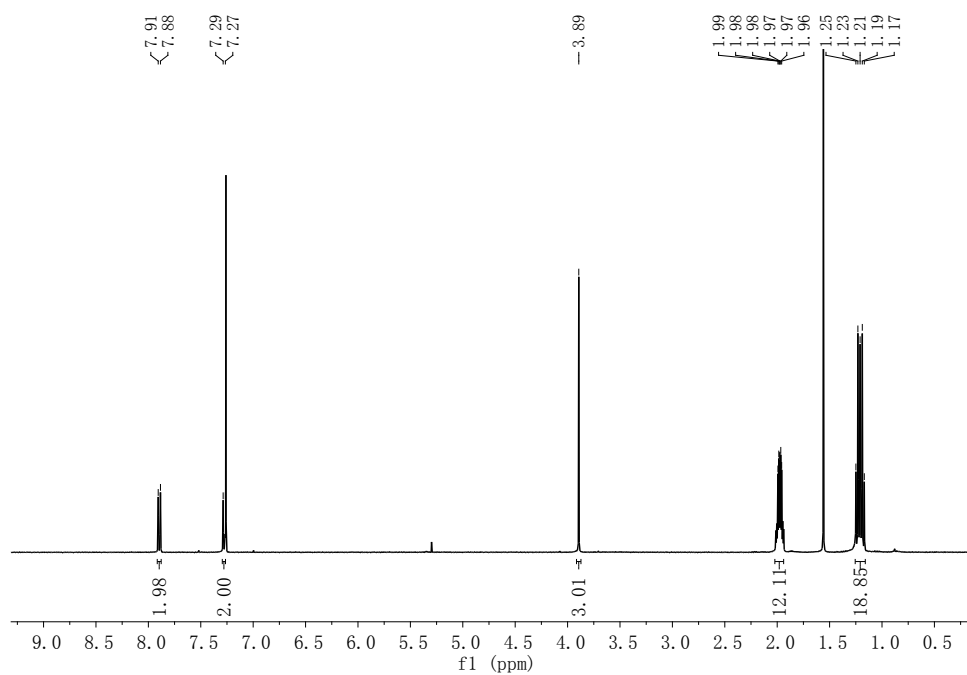

**Fig. S39**  $^1\text{H}$  NMR spectrum of **1d** measured in  $\text{CDCl}_3$  at 25 °C (400 MHz).

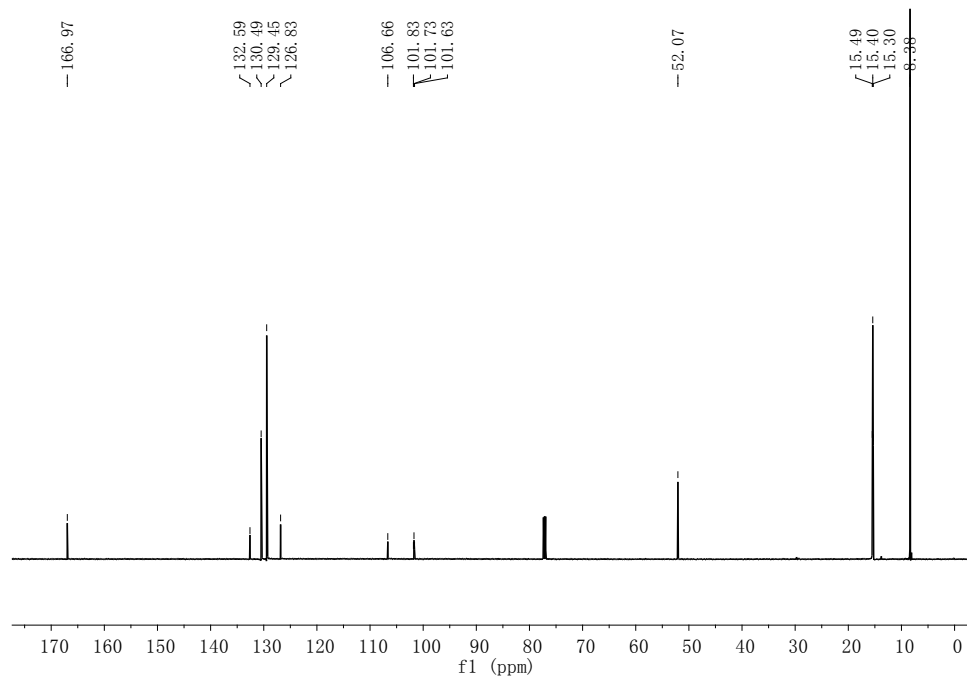

**Fig. S40**  $^{13}\text{C}$  NMR spectrum of **1d** measured in  $\text{CDCl}_3$  at 25 °C (150 MHz).

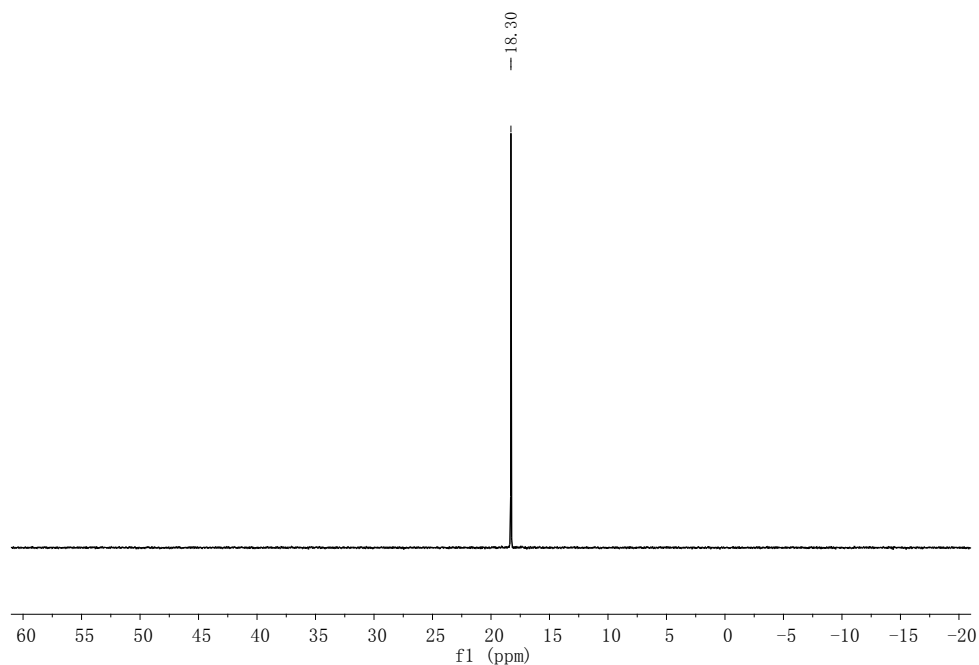

**Fig. S41**  $^{31}\text{P}$  NMR spectrum of **1b** measured in  $\text{CDCl}_3$  at 25 °C (121.5 MHz).

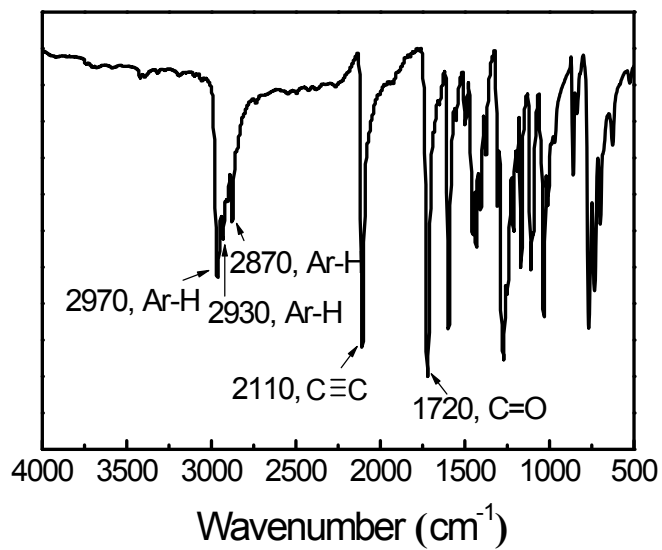

**Fig. S42** FT-IR spectrum of **1d** measured at 25 °C using KBr pellets.

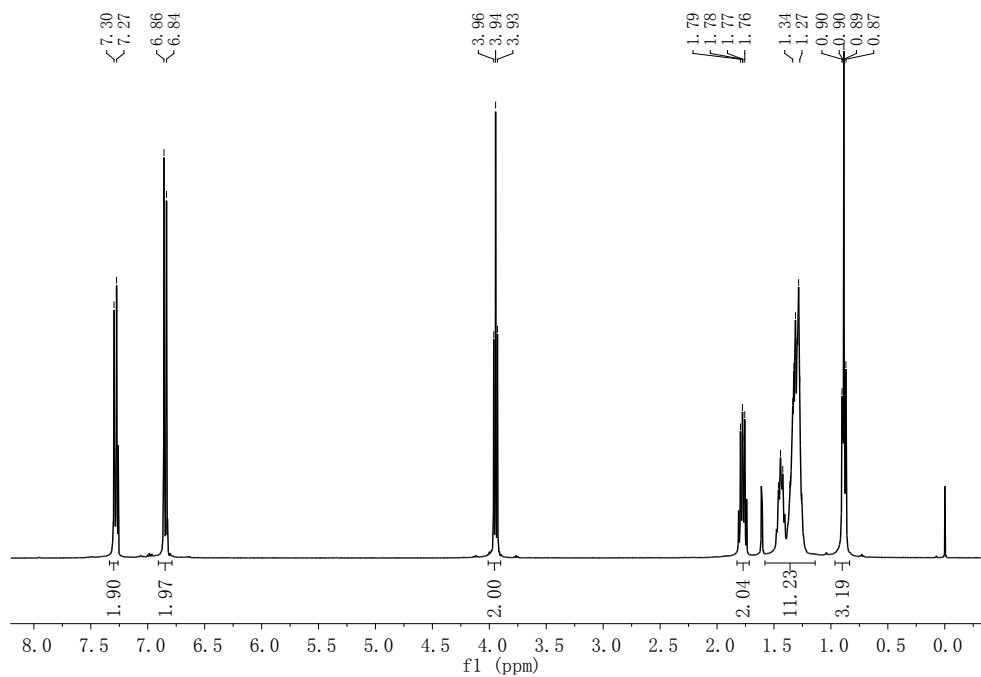

**Fig. S43** <sup>1</sup>H NMR spectrum of **2c** measured in CDCl<sub>3</sub> at 25 °C (400 MHz).

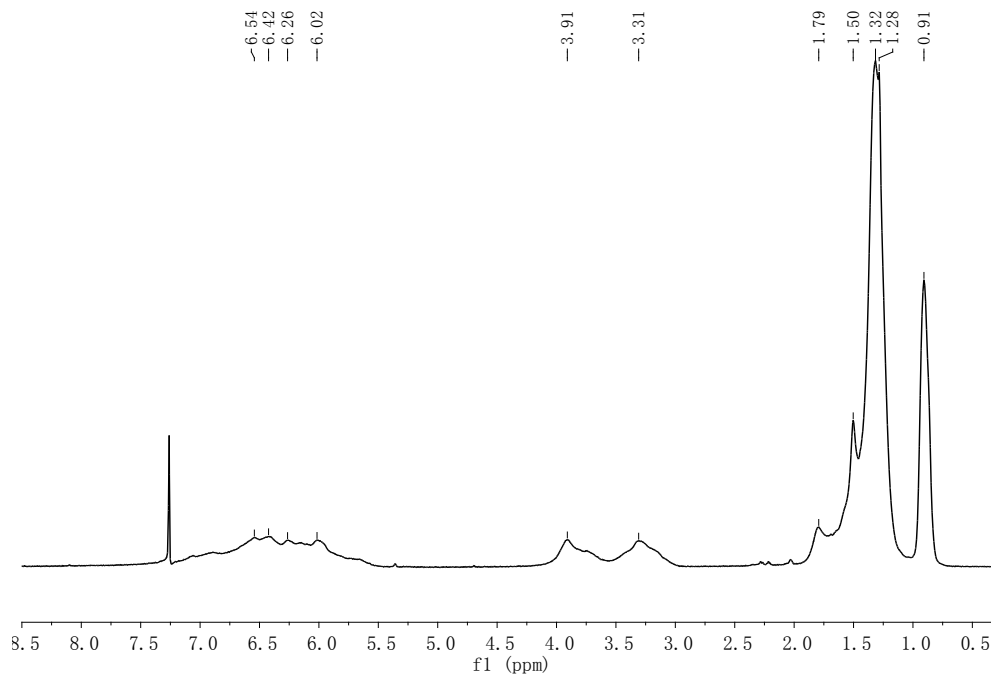

**Fig. S44** <sup>1</sup>H NMR spectrum of poly-**b2c**<sub>60</sub> measured in CDCl<sub>3</sub> at 25 °C (600 MHz).

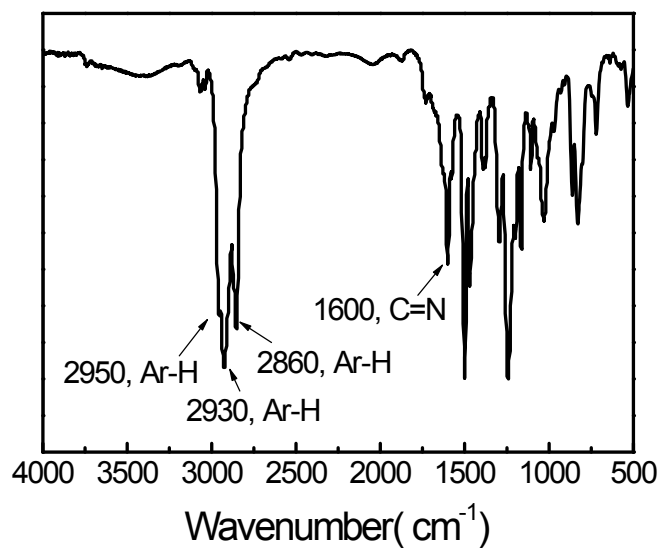

**Fig. S45** FT-IR spectrum of poly-**b2c**<sub>60</sub> measured at 25 °C using KBr pellets.

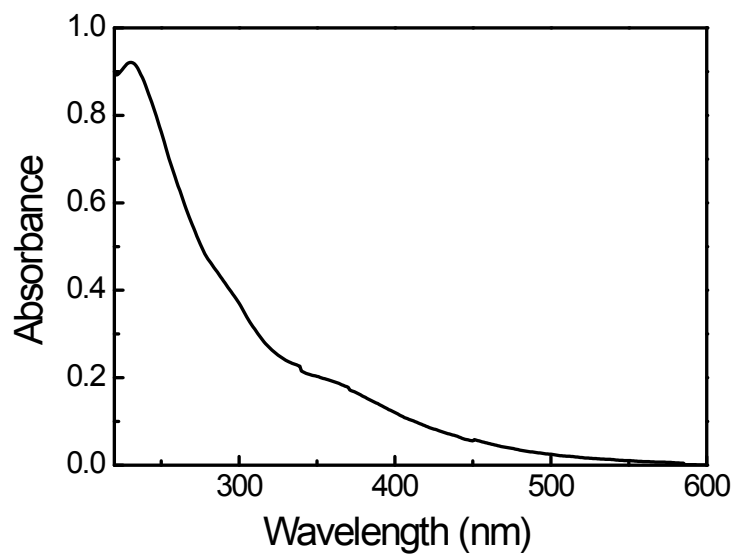

**Fig. S46** UV-vis spectrum of poly-**b2c**<sub>60</sub> measured in CHCl<sub>3</sub> at 25 °C.

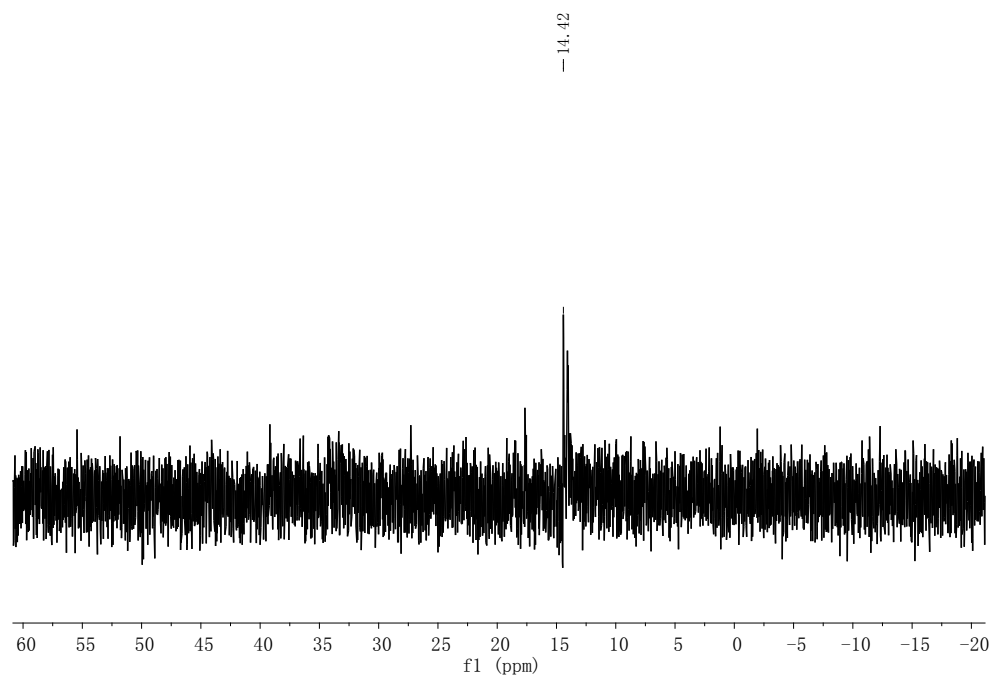

**Fig. S47**  $^{31}\text{P}$  NMR spectrum of poly-**b2c**<sub>60</sub> measured in  $\text{CDCl}_3$  at 25 °C (121.5 MHz).

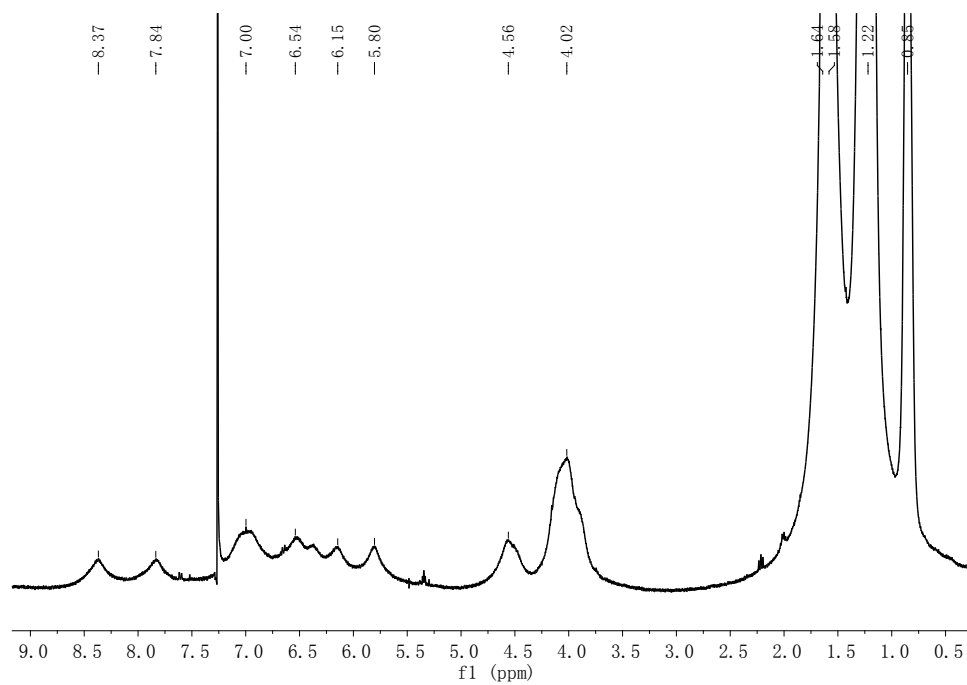

**Fig. S48**  $^1\text{H}$  NMR spectrum of poly-**b2d**<sub>50</sub> measured in  $\text{CDCl}_3$  at 25 °C (600 MHz).



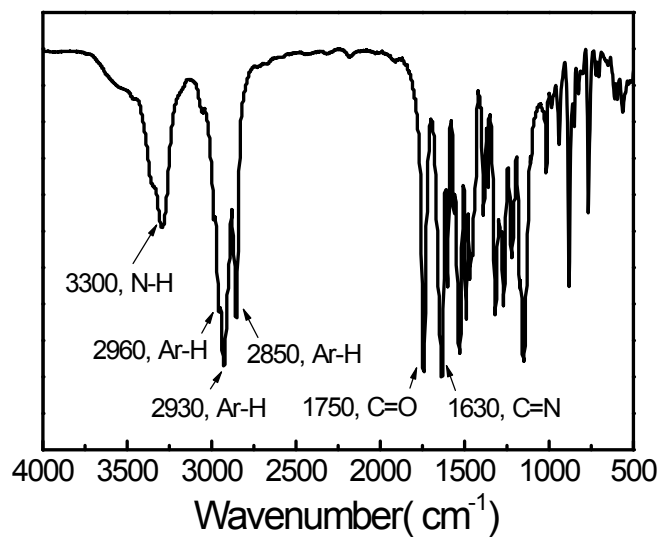

**Fig. S49** FT-IR spectrum of poly-**b2d**<sub>50</sub> measured at 25 °C using KBr pellets.

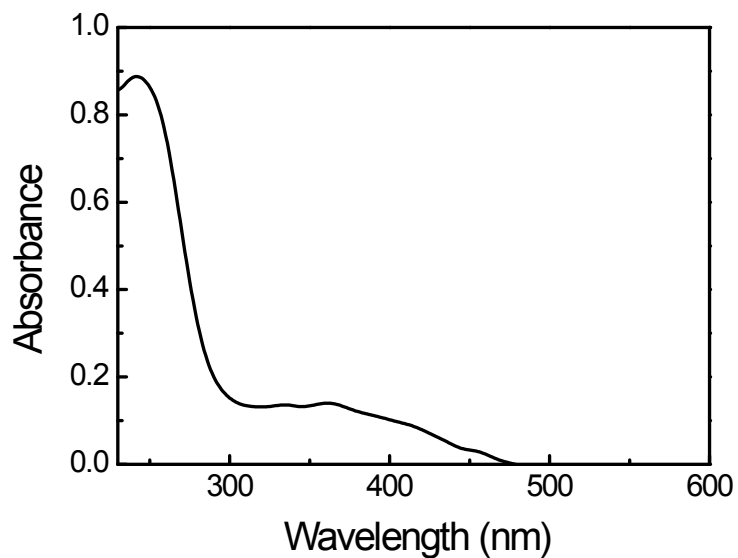

**Fig. S50** UV-vis spectrum of poly-**b2d**<sub>50</sub> measured in CHCl<sub>3</sub> at 25 °C.

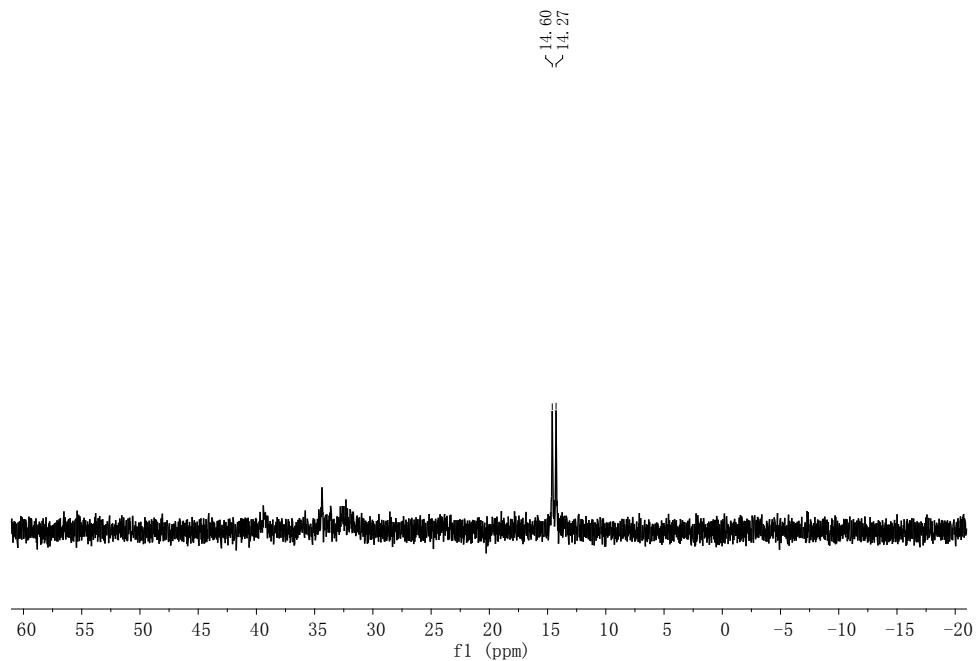

**Fig. S51**  $^{31}\text{P}$  NMR spectrum of poly-**b2d**<sub>50</sub> measured in  $\text{CDCl}_3$  at 25 °C (121.5 MHz).

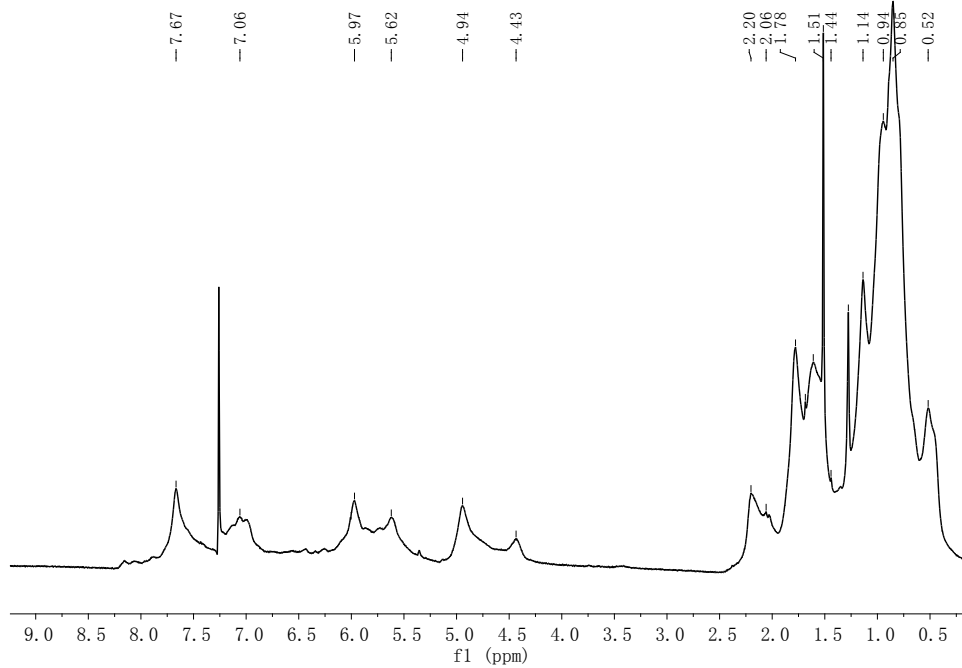

**Fig. S52**  $^1\text{H}$  NMR spectrum of poly-**b2e**<sub>50</sub> measured in  $\text{CDCl}_3$  at 25 °C (600 MHz).

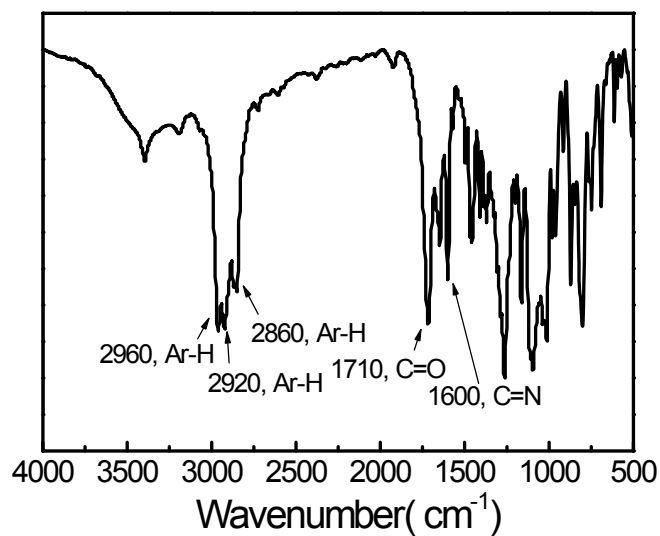

**Fig. S53** FT-IR spectrum of poly-**b2e**<sub>50</sub> measured at 25 °C using KBr pellets.

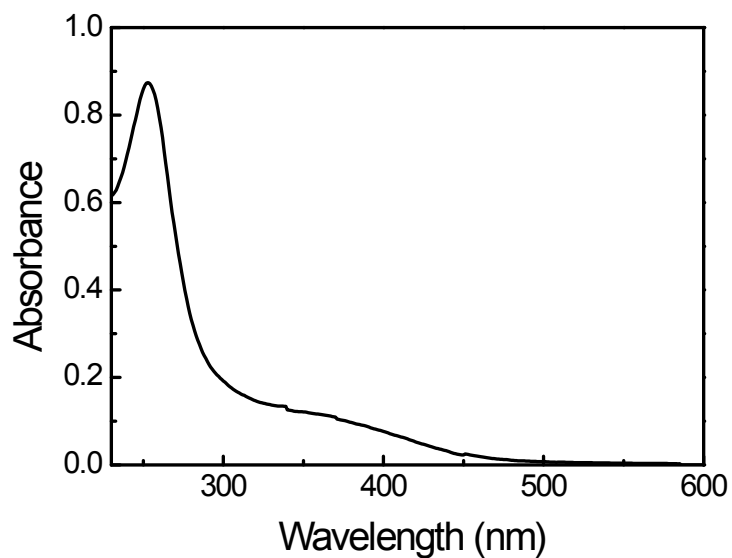

**Fig. S54** UV-vis spectrum of poly-**b2e**<sub>50</sub> measured in CHCl<sub>3</sub> at 25 °C.

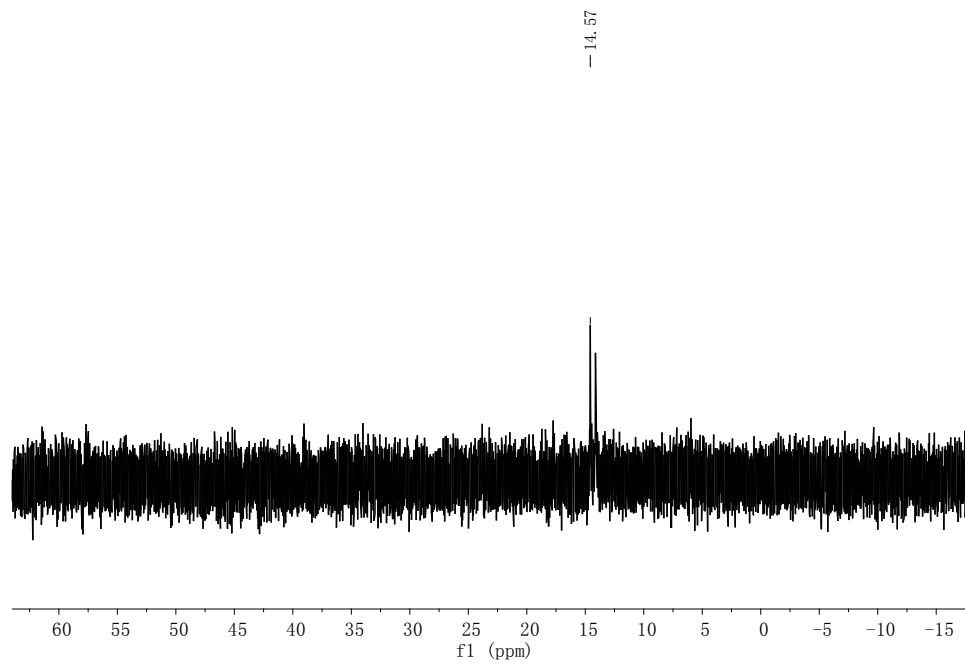

**Fig. S55**  $^{31}\text{P}$  NMR spectrum of poly-**b2e**<sub>50</sub> measured in  $\text{CDCl}_3$  at 25 °C (121.5 MHz).
